# Maturation of persistent and hyperpolarization-activated inward currents shapes the differential activation of motoneuron subtypes during postnatal development

Simon A. Sharples and Gareth B. Miles

School of Psychology and Neuroscience, University of St. Andrews, Fife, United Kingdom.

**Abstract:** The size principle underlies the orderly recruitment of motor units; however, motoneuron size is a poor predictor of recruitment amongst functionally defined motoneuron subtypes. Whilst intrinsic properties are key regulators of motoneuron recruitment, the underlying currents involved are not well defined. Whole-cell patch-clamp electrophysiology was deployed to study intrinsic properties, and the underlying currents, that contribute to the differential activation of delayed and immediate firing motoneuron subtypes. Motoneurons were studied during the first three postnatal weeks in mice to identify key properties that contribute to rheobase and may be important to establish orderly recruitment. We find that delayed and immediate firing motoneurons are functionally homogeneous during the first postnatal week and are activated based on size, irrespective of subtype. The rheobase of motoneuron subtypes become staggered during the second postnatal week, which coincides with the differential maturation of passive and active properties, particularly persistent inward currents. Rheobase of delayed firing motoneurons increases further in the third postnatal week due to the development of a prominent resting hyperpolarization-activated inward current. Our results suggest that motoneuron recruitment is multifactorial, with recruitment order established during postnatal development through the differential maturation of passive properties and sequential integration of persistent and hyperpolarization-activated inward currents.

## Impact Statement

Electrophysiological recordings from mouse spinal motoneurons reveal key roles for ion channels in establishing the differential activation of motoneuron subtypes during postnatal development.

**Key words:** motoneuron, spinal cord, recruitment, size principle, intrinsic properties, postnatal development, electrophysiology

## Introduction

Fine control of muscle force is a prerequisite for the generation of complex movement. This fine control relies on the orderly recruitment of ‘motor units’; the smallest functional unit of the motor system, consisting of alpha motoneurons and the muscle fibres they innervate (Liddell and Sherrington, 1924). Motor units can be subdivided based on the twitch kinetics of their muscle fibres. Different motor units are recruited in order of their force-generating capacity and susceptibility to fatigue, with slow fatigue resistant, fast fatigue resistant, and fast fatigable motor units recruited in sequence (Burke et al., 1973; Henneman, 1957). This orderly recruitment of motor units has been accounted for by the size principle (Burke et al., 1973; Henneman, 1957; Somjen et al., 1965), with smaller motor units recruited prior to larger motor units. Although motoneurons that make up different subtypes of motor units exist on a size-based continuum (Burke et al., 1982), there is considerable overlap in geometrical and physiological measures of size between motoneuron subtypes, such that motoneuron size appears to be a poor predictor of recruitment order (Gustafsson and Pinter, 1984; Zengel et al., 1985). It has therefore been argued that recruitment order is more heavily influenced by the functional subtype of a given motor unit and not strictly dependent on physical size (Burke et al., 1973; Cope and Clark, 1991; Cope and Pinter, 1995; Zajac and Faden, 1985). Here we address whether motoneuron recruitment is purely dependent on the size principle, or whether functional classes of spinal motoneurons possess distinct electrophysiological properties that help ensure orderly recruitment of motoneuron subtypes.

The intrinsic excitability of neurons is influenced by their compartmental geometrical structures, which are endowed with specialized complements of ion channels that support flexible output (Brocard, 2019; Deardorff et al., 2021; Heckman et al., 2008a). For example, non-linearities in the input-output relationship of motoneurons are produced by persistent inward currents (PICs) generated by persistent sodium and L-type calcium channels located on the axon initial segment and distal dendrites respectively (Brocard et al., 2016; Chatelier et al., 2010; Hounsgaard et al., 1988; Hounsgaard and Kiehn, 1993; Lee and Heckman, 1998a; Li and Bennett, 2003; Quinlan et al., 2011; Schwindt and Crill, 1980, 1977). Variations in the complement of ion channels expressed by subtypes of spinal motoneurons have been demonstrated and their roles in producing non-linear firing behaviours described (Bos et al., 2018; Brocard, 2019; Heckman et al., 2008b; Souldard et al., 2020). Many of these currents are activated below the spike threshold, meaning their differential expression is also likely to contribute to orderly recruitment across motoneuron subtypes (Zhang and Dai, 2020).

To address the role of specific ion channels in motoneuron subtype recruitment, we studied differences in the intrinsic properties and underlying currents that contribute to the activation of putative fast and slow motoneurons, which were identified based on delayed and immediate firing profiles during whole cell patch clamp electrophysiological recordings in lumbar spinal cord slices of postnatal mice (Bhumbra and Beato, 2018; Bos et al., 2018; Durand et al., 2015; Leroy et al., 2015, 2014). Activation currents, otherwise known as rheobase currents, were measured as a proxy for motoneuron recruitment. We used postnatal development as a model to dissect the relative importance of the intrinsic properties of motoneurons to the differential activation of motoneuron subtypes, which contributes to the orderly recruitment of motoneurons required for the gradation of muscle force and fine motor control. Postnatal development in the rodent provides an opportune system to address this issue given that animals are largely sessile during the first postnatal week, produce rudimentary weight-bearing, hindlimb-based locomotion during week 2 (Brocard et al., 1999), and complex locomotor behaviours consistent with adult animals by week 3 (Altman and Sudarshan, 1975). It would therefore be expected that key properties that establish orderly recruitment of functionally defined motoneuron subtypes would manifest in parallel with the emergence of complex motor behaviour during postnatal development.

## Postnatal development of motoneuron activation properties

We identify key properties and underlying currents of motoneuron subtypes and pinpoint when these properties contribute to the functional differentiation of motoneuron subtypes, particularly with respect to their rheobase currents, during postnatal development. We find that during the first postnatal week, lumbar motoneurons are activated according to passive properties predictive of size; however, delayed and immediate firing subtypes are functionally homogeneous leading to overlap in rheobase currents across motoneuron subtypes. Rheobase current of delayed and immediate firing motoneurons then becomes staggered by the second postnatal week, which coincides with an increase in the size of delayed firing motoneurons and a more depolarized activation of sodium PICs in delayed firing motoneurons. Rheobase current becomes staggered further during week 3, as delayed-firing motoneurons develop a prominent hyperpolarization-activated inward current ( $I_h$ ) that is active at resting membrane potential and may further increase rheobase current, possibly by providing a depolarizing shunt. Taken together, our data demonstrate that motoneuron recruitment is multifactorial and support the notion that fast motoneurons are not simply scaled up versions of slow motoneurons (Kernell and Zwaagstra, 1981). Whilst recruitment is influenced by size, activation properties of inward currents, which are differentially expressed in motoneuron subtypes, ensure orderly recruitment of functionally defined subtypes of spinal motoneurons.

### Results

#### Motoneuron subtypes diversify functionally during postnatal development

We used whole cell patch clamp electrophysiology to define the intrinsic properties that differentiate motoneuron subtypes and support orderly recruitment. We adopted an established electrophysiological approach to identify two motoneuron subtypes in vitro based on their repetitive firing profiles in response to the injection of a 5 second depolarizing square current pulse at rheobase (Bhumbra and Beato, 2018; Bos et al., 2018; Durand et al., 2015; Leroy et al., 2015, 2014). The motoneuron subtypes that were identified included a delayed repetitive firing profile with an accelerating firing rate (Figure 1A1, B1), and an immediate repetitive firing profile with a steady or adapting firing rate (Figure 1A2, B2). We identified delayed and immediate firing motoneurons at all ages studied (P1-20) with intrinsic properties that are consistent with those of fast and slow motoneurons respectively (Figure 1C-E; Supplementary Table 1) (Gardiner, 1993; Gustafsson and Pinter, 1984; Leroy et al., 2014; Martínez-Silva et al., 2018). Our measurements of intrinsic properties are in line with previous reports from mouse lumbar motoneurons at similar postnatal stages (Leroy et al., 2014; Nakanishi and Whelan, 2010; Quinlan et al., 2011; Smith and Brownstone, 2020). Postnatal development in mice is highly stereotyped, with hindlimb weight-bearing emerging during the second postnatal week and complex locomotor behaviours emerging after the start of the third (Altman and Sudarshan, 1975). We therefore grouped motoneurons by week to explore broad changes in intrinsic properties of motoneuron subtypes between behaviourally defined milestones across motor development. Principal Component Analysis (PCA) was first deployed to identify global changes in intrinsic properties of motoneuron subtypes during development given the high dimensionality (25 variables) and large sample size ( $N = 261$  motoneurons, 95 animals) of our data (Figure 2). This allowed us to focus subsequent analyses on variables that covary across motoneuron type during postnatal development.

## Postnatal development of motoneuron activation properties

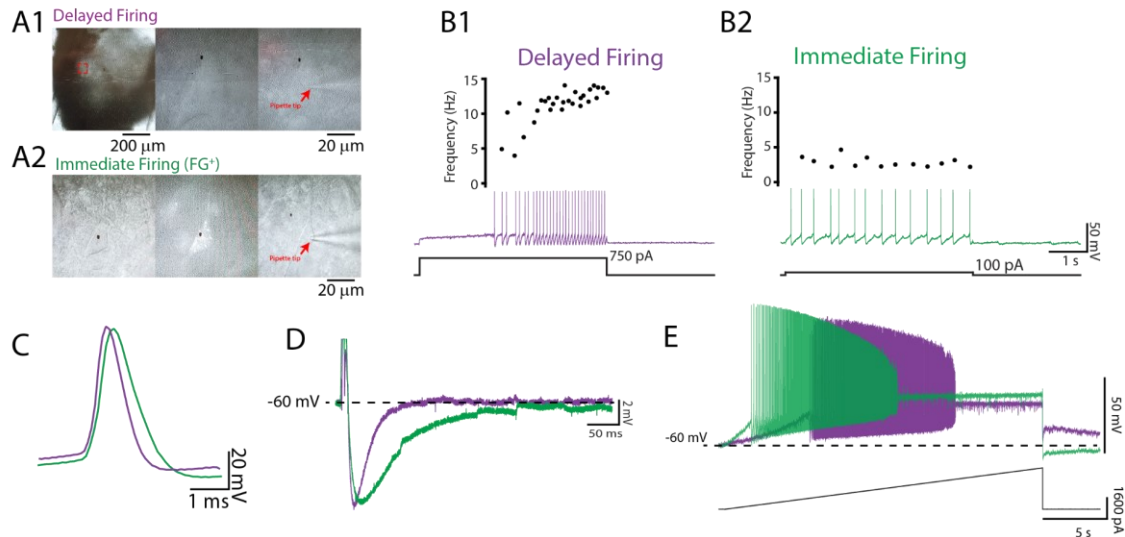

**Figure 1: Delayed and immediate firing motoneurons exhibit intrinsic properties consistent with fast and slow type motoneurons, respectively.** A.) Whole cell patch clamp recordings were obtained from motoneurons identified in the ventrolateral horn of the lumbar spinal cord with a subset retrogradely-labelled with fluorogold injected intraperitoneally. Two motoneuron subtypes were identified based on the onset latency for repetitive firing and subsequent changes in firing rates during a 5 second depolarizing current step applied at rheobase (B): A delayed onset of repetitive firing and an accelerating firing rate (B1; purple) and an immediate onset for repetitive firing with a stable or adapting firing rate (B2; green). Delayed and immediate firing motoneuron subtypes display intrinsic properties that are consistent with those of fast and slow type motoneurons illustrated by broader single action potentials (C), longer medium afterhyperpolarizations (D), and lower rheobase currents (E) in immediate compared to delayed firing motoneurons.

PCA identified six principal components (PC's) that accounted for greater than 75% of variance; 48% of which was accounted for by PC1 and PC2 (Figure 2A). PC1 accounted for 35.5% of variance and as would be expected, had the greatest loading scores from rheobase current (0.82) and passive properties such as input resistance (-0.83) and membrane time constant (-0.7), but a relatively low weight from whole cell capacitance (0.54), which is related to cell surface area (Gustafsson and Pinter, 1984; Taylor, 2012) (Figure 2B). Analysis of PC scores for PC1 revealed differential maturation in delayed and immediate firing motoneurons whereby PC1 scores increased in delayed but did not change in immediate firing motoneurons, with differences between delayed and immediate firing motoneurons revealed at weeks 2 and 3, but not week 1 (Figure 2D;  $F_{(2,187)} = 14.1$ ,  $p = 2.1 \times 10^{-6}$ ). PC2 accounted for 14.0% of variance, had the greatest loading from action potential threshold voltage (0.77), which can also influence rheobase (Figure 2B), and matured in parallel in delayed and immediate firing motoneurons. PC2 scores were larger in slow motoneurons in week 1, decreasing in both subtypes, but to a greater extent in immediate firing motoneurons, such that PC2 scores were more negative in immediate compared to delayed firing motoneurons in week 3 (Figure 2E;  $F_{(2,228)} = 8.6$ ,  $p = 2.5 \times 10^{-4}$ ). PC3 accounted for 9.6% of variance and had the greatest loading score derived from repetitive firing properties such as maximum firing rate (0.78) and frequency-current gain within the sub-primary range (0.73) (Figure 2C). PC3 scores decreased in immediate firing motoneurons only between weeks 2 and 3 (Figure 2F;  $F_{(2,228)} = 21.9$ ,  $p = 1.7 \times 10^{-9}$ ). AHP half width is a strong predictor of motoneuron type (Gustafsson and Pinter, 1984) and in line with this, scored high for PC1 (-0.6) but relatively lower for PC2 (0.5) and PC3 (0.3). Further analysis revealed an increase in clustering of PCs 1-3 in delayed and immediate firing motoneurons as a function of development (Figure 2G-I) indicating that these two populations functionally diverge during postnatal development. PCs 4-6 accounted for less variance within our data (PC4: 7.4%; PC5: 5.5%; PC6: 4.8%) than PCs 1-3 and did not significantly change during development or reveal differences between motoneuron subtypes.

Postnatal development of motoneuron activation properties

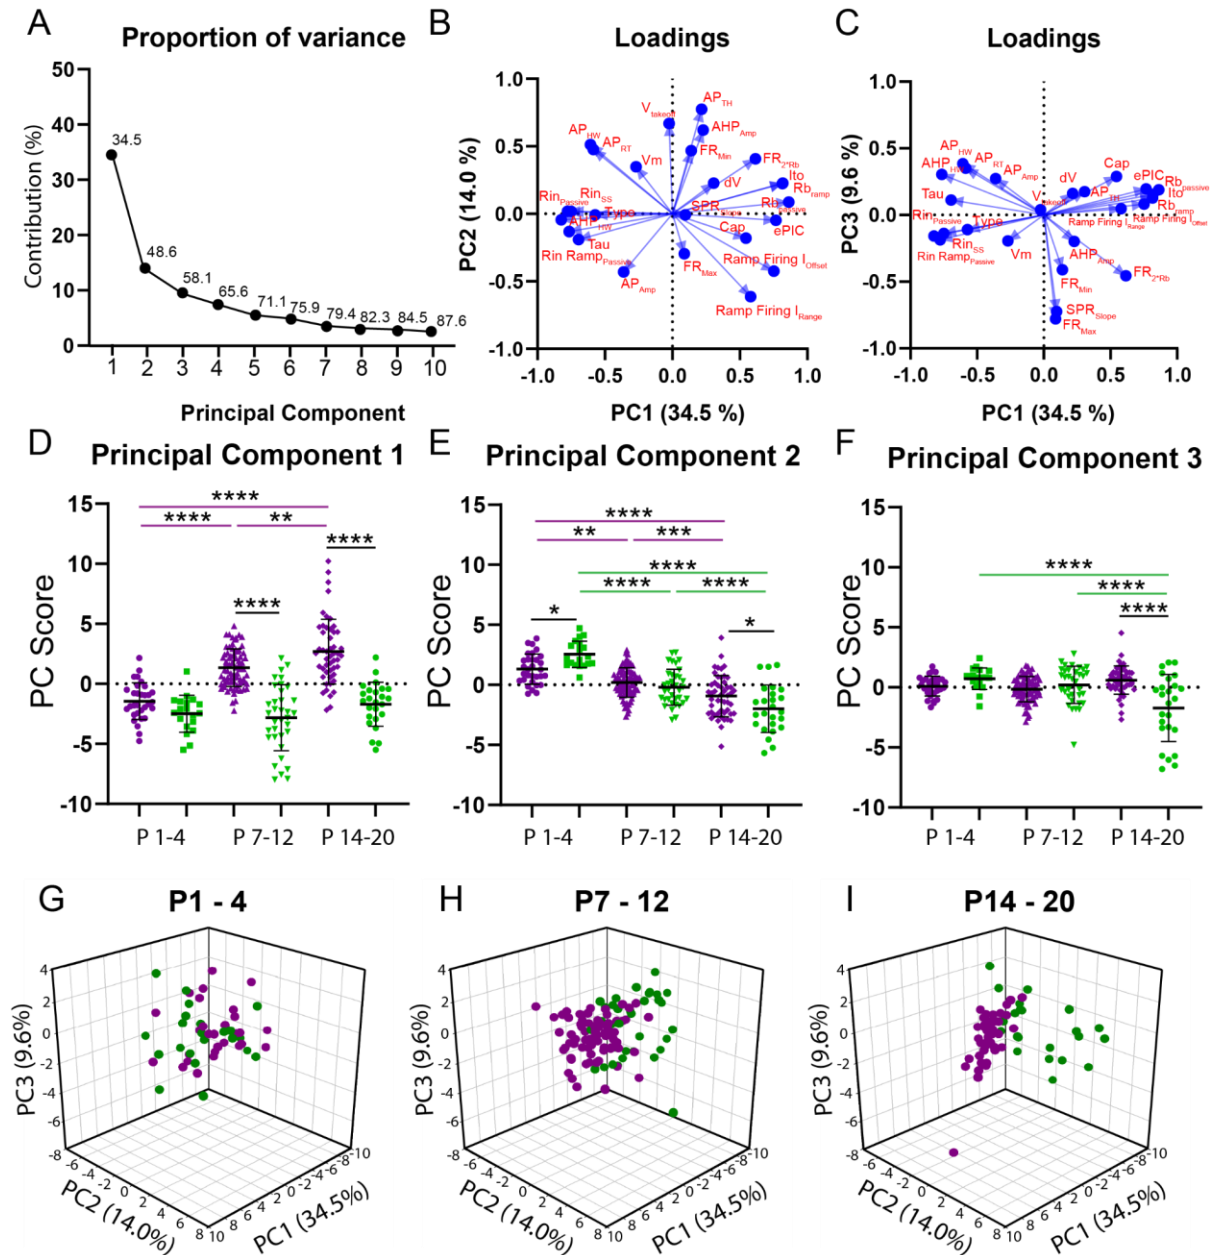

**Figure 2: Principal Component Analysis (PCA) reveals divergent maturation of the intrinsic properties of delayed and immediate firing motoneuron subtypes during postnatal development.** A.) Scree plot illustrating 10 Principal Components (PCs) identified in the PCA, with the first 6 accounting for greater than 75% of variance. B.) Variable loadings for PC1 and PC2 with arrow length representing loading score for each variable denoted in red text. C.) Variable loadings for PC1 and PC3 with arrow length representing loading score for each variable (red). D-F: PC scores for Principal Component 1-3 for delayed (purple) and immediate-firing (green) motoneurons across the first three weeks of postnatal development. Individual PC scores are displayed for each cell, black bars represent mean  $\pm$  SD. Statistical analysis was conducted using a 2-way ANOVA and Holm-Sidak post hoc analysis. Asterisks denote significant differences from pairwise comparisons \*  $p < 0.05$ , \*\*  $p < 0.01$ , \*\*\*  $p < 0.001$ , \*\*\*\*  $p < 0.0001$ . G-H: 3D scatterplots between PCs 1-3 for delayed (purple) and immediate firing (green) motoneurons across weeks 1-3.

## Postnatal development of motoneuron activation properties

### Postnatal diversification of intrinsic properties shapes the rheobase of motoneuron subtypes

PCA indicated that rheobase current is a key predictor of the two motoneuron subtypes and can account for the greatest variance across postnatal development. Rheobase, defined as the minimal current to elicit repetitive firing of action potentials, was measured during slow (100 pA/s) depolarizing current ramps in addition to long (5 s) depolarizing current steps that were used to identify motoneuron types. Both measures of rheobase were strongly correlated at all ages studied (Supplementary Figure 1 A-C; W1:  $r = 0.87$ ,  $p < 1.0e-15$ ; W2:  $r = 0.95$ ,  $p < 1.0e-15$ ; W3:  $r = 0.92$ ,  $p < 1.0e-15$ ) and demonstrated similar changes during postnatal development (Supplementary Figure 1 D, E). We therefore next set out to determine intrinsic properties that mature in parallel, contribute to changes in rheobase current measured with depolarizing current ramps during postnatal development, and may therefore contribute to the establishment of orderly recruitment of motoneuron subtypes.

As would be expected based on the size principle, passive properties contributed substantially to the loading scores within PC1. Rheobase current and passive properties did not differ between delayed and immediate firing motoneurons during the first postnatal week (Figure 3D - G); however, rheobase current was correlated with passive properties such as capacitance and input resistance irrespective of motoneuron subtype at this point in time (Figure 3H1 - I1). This finding is supportive of an early activation scheme that is based on size rather than functionally defined subtypes of motoneurons.

The rheobase current then increased in delayed but not immediate firing motoneurons between weeks 1 and 2 (Figure 3D;  $F_{(2,247)} = 12.1$ ,  $p = 9.6e-6$ ). The non-uniform maturation of rheobase currents between motoneuron subtypes led to a 57% increase in the rheobase current range (W1: 909 pA; W2: 1596 pA) and a decrease in the recruitment gain across the samples of motoneurons studied (Figure 3E). In line with what would be predicted based on the size principle, we found a parallel increase in whole cell capacitance (Figure 3F;  $F_{(2,253)} = 3.6$ ,  $p = 0.03$ ), and a reduction in input resistance (Figure 3G;  $F_{(2,253)} = 10.6$ ,  $p = 3.9e-5$ ) in delayed but not immediate firing motoneurons between weeks 1 and 2. As a result, rheobase currents of delayed and immediate firing motoneurons become functionally staggered during week 2, whereby delayed firing motoneurons have a significantly higher rheobase current, whole cell capacitance, and lower input resistance than immediate firing motoneurons. The membrane time constant increased between weeks 1 and 2 in immediate but not delayed firing motoneurons, leading to a longer time constant in immediate compared to delayed firing motoneurons during week 2 (Supplementary Table 1;  $F_{(2,253)} = 7.9$ ,  $p = 4.7e-4$ ). Together these results indicate that maturation of motoneuron passive properties contribute to the functional specification of motoneuron subtypes during the second postnatal week.

The rheobase current increased further in delayed but not immediate firing motoneurons between weeks 2 and 3 (Figure 3D;  $F_{(2,247)} = 12.1$ ,  $p = 9.6e-6$ ), leading to a 182% increase in rheobase current range compared to week 2 and a 320% increase compared to week 1 (W3: 2906 pA) and a further decrease in the recruitment gain (Figure 3E). However, the increase in rheobase current in week 3 was not paralleled by further changes in passive properties. In fact, the relationship between rheobase current and capacitance appears to become weaker over this time period (Figure 3H: W1:  $r^2 = 0.35$ , W2:  $r^2 = 0.27$ , W3:  $r^2 = 0.25$ ). This result suggests that rheobase current, and its maturation between weeks 2 and 3, may not be solely dependent on passive properties, as would be predicted by the size principle.

## Postnatal development of motoneuron activation properties

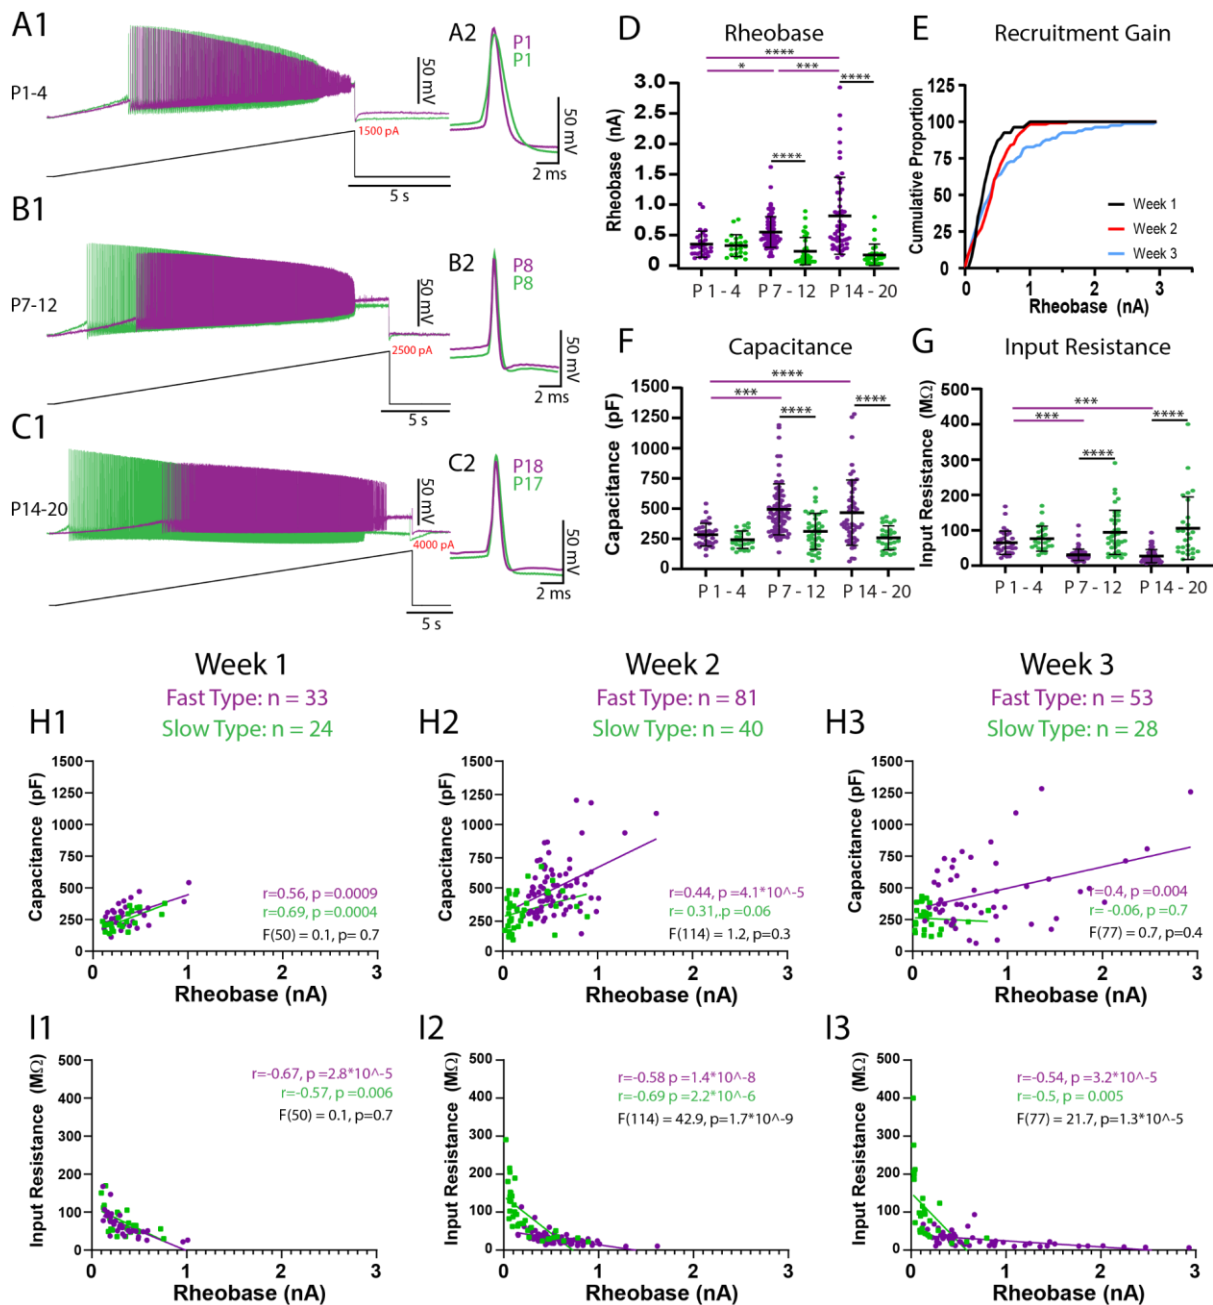

**Figure 3: Passive properties contribute to maturation of rheobase currents between weeks 1 and 2 but additional factors contribute from weeks 2 to 3.** The rheobase current of delayed (purple) and immediate-firing (green) motoneurons was assessed using slow (100pA/s) depolarizing current ramps. A-C: Representative traces of rheobase and repetitive firing of delayed and immediate firing motoneurons at weeks 1-3. A2-C2: First action potential produced upon recruitment for delayed and immediate-firing motoneurons at weeks 1-3. D.) Rheobase increases in delayed but not immediate firing motoneurons across weeks 1-3. E.) Cumulative proportion histograms of rheobase currents of motoneurons sampled during weeks 1 (black), 2 (red), and 3 (blue) indicate a progressive decrease in the recruitment gain. F.) Whole cell capacitance increases, and input resistance decreases (G) in delayed but not immediate firing motoneurons between weeks 1 and 2 but not further into week 3. Individual data points are displayed, black bars represent mean  $\pm$  SD. Statistical analysis was conducted using a 2-way ANOVA and Holm-Sidak post hoc analysis. Asterisks denote significant differences from pairwise comparisons \*  $p < 0.05$ , \*\*  $p < 0.01$ , \*\*\*  $p < 0.001$ , \*\*\*\*  $p < 0.0001$ . Scatterplots of rheobase current, and passive properties (H: Whole cell capacitance; I: Input resistance) (Gustafsson and Pinter, 1984), for delayed (purple) and immediate-firing (green) motoneurons during postnatal weeks 1, 2 and 3. Pearson correlations were performed for each type at each time point with outcomes displayed in purple text for delayed and green text for immediate-firing motoneurons. A simple linear regression comparing the regression slopes for each motoneuron subtype at each time point was performed to determine the degree of similarities between subtypes with outcomes displayed in black text.

### **Persistent inward currents contribute to the rheobase of delayed and immediate firing motoneurons but not their maturation between weeks 2 and 3**

Changes in the membrane potential of motoneurons in response to slow depolarizing current ramps are characterized by two phases: an initial linear phase, presumably predominated by passive properties, and an accelerating depolarization of the membrane potential (Figure 4A), mediated by the activation of persistent inward currents (PICs) (Delestrée et al., 2014; Iglesias et al., 2011; Kuo et al., 2006). We find evidence for both phases in delayed and immediate firing motoneurons at all ages (P1 - 20). PICs have been extensively studied in spinal motoneurons and underlie non-linear firing behaviours (Heckman et al., 2008b; Schwindt and Crill, 1980, 1977), but their relative contribution to rheobase have been less explored. We therefore next tested the possibility that PICs may have a larger impact on the trajectory of the membrane potential in immediate firing motoneurons compared to that of delayed firing motoneurons and may therefore shape their rheobase at stages when our data suggest that differential recruitment cannot be governed by size-based principles alone.

The influence of PICs on rheobase were first estimated by calculating the difference between the measured rheobase current and an estimate of what the rheobase current would be if the membrane depolarisation followed a linear trajectory determined by passive properties alone (Fig. 4A  $I_{\text{passive}} - I_{\text{actual}}$ ) (Delestrée et al., 2014; Jørgensen et al., 2020). This estimate of PIC is denoted ePIC and did not differ between delayed and immediate firing motoneurons in week 1, increased in delayed firing motoneurons only in weeks 2 and 3, and was larger in delayed compared to immediate firing motoneurons at both time points (Figure 4B:  $F_{(2,242)} = 10.2$ ,  $p = 5.7e-5$ ). We also assessed the influence of PICs on motoneuron output during triangular depolarizing current ramps as an additional and well-established estimate of PIC magnitude (Harvey et al., 2006a; Hounsgaard et al., 1988; Quinlan et al., 2011; Schwindt and Crill, 1977) (Supplementary Figure 2). In this assay, a lower current at derecruitment on the descending limb of the triangular ramp compared to the recruitment current on the ascending limb (negative Delta I) is evidence of a PIC (Harvey et al., 2006c; Hounsgaard and Kiehn, 1985). Delta I did not differ between delayed and immediate firing motoneurons during week 1, became more negative (increased PIC) in delayed firing motoneurons during week 2, but did not change further into week 3 (Supplementary Figure 2;  $F_{(2,165)} = 6.1$ ,  $p = 0.003$ ).

The underlying PICs were next measured directly in voltage clamp during slow (10 mV/s) depolarizing voltage ramps (Figure 4E, F) (Lee and Heckman, 1998a; Quinlan et al., 2011) to account for the possibility that current clamp-based estimates of PIC may not be purely dependent on PICs. In line with our two estimates of PICs measured in current clamp, the amplitude of the PIC measured in voltage clamp was significantly larger in delayed compared to immediate firing motoneurons at weeks 2 and 3 (Figure 4G;  $F_{(1,61)} = 17.9$ ,  $p = 7.8e-5$ ), which can be accounted for by the larger size (higher capacitance) of delayed compared to immediate firing motoneurons given that PIC density (current/whole cell capacitance) did not differ between subtypes (Supplementary Table 2). PIC amplitude did not change in either subtype between weeks 2 and 3 (Figure 4G;  $F_{(1,61)} = 0.02$ ,  $p = 0.9$ ) and was not correlated with rheobase current at either age (W2:  $r = -0.1$ ,  $p = 0.5$ ; W3:  $r = -0.2$ ,  $p = 0.2$ ).

Differences in the magnitude of PICs between delayed and immediate firing motoneurons do not appear to explain differences in rheobase of motoneuron subtypes or changes that we observe during development; in fact, they might support a lower rheobase in delayed firing motoneurons. We therefore considered other factors, which may contribute to differences in rheobase, such as the voltage at which PICs first activate. We found no difference in the voltage at which depolarisation of the membrane potential began to accelerate, in response to slow depolarising current ramps, between motoneuron subtypes during week 1. However, the onset of the acceleration phase became hyperpolarized in both



## Postnatal development of motoneuron activation properties

motoneuron subtypes in week 2 and continued to hyperpolarize even further in the immediate firing motoneurons into week 3, becoming significantly more hyperpolarized compared to delayed firing motoneurons (Figure 4C;  $F_{(2,247)} = 6.1$ ,  $p = 0.003$ ). Interestingly, acceleration onset voltage and spike threshold matured in parallel (Figure 4D), such that the amplitude of the depolarizing acceleration from onset to spike threshold, were similar between delayed and immediate firing motoneurons and maintained at all ages (Supplementary Table 2;  $F_{(2,247)} = 2.2$ ,  $p = 0.1$ ). In line with estimates of PICs in current clamp, PIC onset voltage measured in voltage clamp was more depolarized in delayed compared to immediate firing motoneurons at both weeks 2 and 3 ( $F_{(1,61)} = 57.6$ ,  $p = 2.2e-10$ ), did not change between weeks 2 and 3 in either motoneuron type (Figure 4H;  $F_{(1,61)} = 0.2$ ,  $p = 0.7$ ), but was correlated with rheobase current at both ages (W2:  $r = 0.4$ ,  $p = 0.007$ ; W3:  $r = 0.7$ ,  $p = 1.3e-5$ ). Interestingly, PIC activation in immediate firing motoneurons occurs relatively close to their respective resting membrane potential (RMP: W2:  $-58.3 \pm 5.4$ ; W3:  $-61.5 \pm 6.7$  mV) which may facilitate their recruitment (Supplementary Table 1; Supplementary Table 2).

PICs are produced by a combination of ion channels that conduct sodium and calcium currents, with sodium PICs activated at more hyperpolarized voltages than calcium PICs (Li and Bennett, 2003; Quinlan et al., 2011). We deployed pharmacological tools to block NaV1.6 channels (Brocard et al., 2016; Krzemien et al., 2000; Li and Bennett, 2003; Schaller and Caldwell, 2000) and L-type calcium channels (Anelli et al., 2007; Bouhadfane et al., 2013; Hounsgaard and Kiehn, 1993; Li et al., 2004; Perrier and Hounsgaard, 1999; Zhang et al., 2006), which conduct a part of the sodium and calcium PICs respectively, to determine the relative contribution of each type of PIC to rheobase of motoneuron subtypes. Blocking Nav1.6 channels with the selective blocker, 4,9-Anhydrotetrodotoxin (4,9-AH-TTX: 200 nM) produced a 31% reduction in PIC amplitude in delayed firing motoneurons and a 60% reduction in PIC amplitude of immediate firing motoneurons (Figure 4J; Delayed:  $n = 22$  MNs, 11 animals; Immediate:  $n = 12$  MNs, 7 animals;  $F_{(1,29)} = 22.9$ ,  $p = 4.7e-5$ ). Blocking L-type calcium channels with nifedipine (20  $\mu$ M) produced a 22% reduction in PIC amplitude of delayed firing motoneurons but did not change PIC amplitude of immediate firing motoneurons (Figure 4K; Delayed:  $n = 16$  MNs, 9 animals; Immediate:  $n = 10$  MNs, 7 animals;  $F_{(1,18)} = 6.4$ ,  $p = 0.02$ ). Blocking NaV1.6 channels depolarized the PIC onset voltage (Figure 4L;  $F_{(1,28)} = 15.7$ ,  $p = 4.6e-4$ ), and spike threshold (BL:  $-34.8 \pm 6.0$  mV; 4,9-AH-TTX:  $-26.9 \pm 6.3$  mV;  $F_{(1,29)} = 14.2$ ,  $p = 6.6e-4$ , Holm Sidak post hoc  $p = 5.9e-11$ ) of delayed firing motoneurons, which translated to an increase in their rheobase current (Figure 4N, O;  $F_{(1,29)} = 33.9$ ,  $p = 2.6e-6$ ). 4,9-AH-TTX also depolarized the spike threshold of immediate firing motoneurons (BL:  $-45.2 \pm 5.7$  mV; 4,9-AH-TTX:  $-42.1 \pm 8.5$  mV; Holm-Sidak post hoc  $p = 0.01$ ), however, it did not alter their PIC onset voltage (Figure 4L; Holm Sidak post-hoc  $p = 0.14$ ) or rheobase current (Figure 4O; Holm Sidak post-hoc  $p = 0.47$ ). The differential control of rheobase between motoneuron subtypes led to an overall decrease in the recruitment gain across the population of motoneurons studied (Figure 4P). Blocking L-type calcium channels with nifedipine did not change PIC onset voltage (Figure 4M;  $F_{(1,18)} = 0.31$ ,  $p = 0.58$ ), rheobase (Figure 4N, Q;  $F_{(1,20)} = 1.2$ ,  $p = 0.3$ ), or spike threshold (Del: BL:  $-38.2 \pm 7.5$  mV; Nif:  $-38.4 \pm 10.1$  mV; Imm: BL:  $-45.2 \pm 7.4$  mV; Nif:  $-42.2 \pm 6.6$  mV;  $F_{(1,25)} = 1.0$ ,  $p = 0.3$ ) in delayed or immediate firing motoneurons and as a result, recruitment gain was unaltered (Figure 4R).

In these experiments, we set out to determine roles for active properties in shaping motoneuron rheobase and its maturation during postnatal development. These data indicate that PIC activation threshold is more important for shaping rheobase than the overall PIC amplitude, with different complements of ion channels contributing to PIC amongst motoneuron subtypes. Further, rheobase current is not purely dependent on input resistance and is also influenced by properties of currents that are activated in the subthreshold voltage range. Thus, in addition to passive property maturation, differences in the

## Postnatal development of motoneuron activation properties

activation properties of PICs may contribute to the staggering or rheobase currents amongst motoneuron subtypes in week 2. However, it is unlikely that PICs contribute to further increases in the rheobase current of delayed firing motoneurons into week 3, given that PIC onset voltage, which is the most important property of the PIC for rheobase, does not change between weeks 2 and 3.

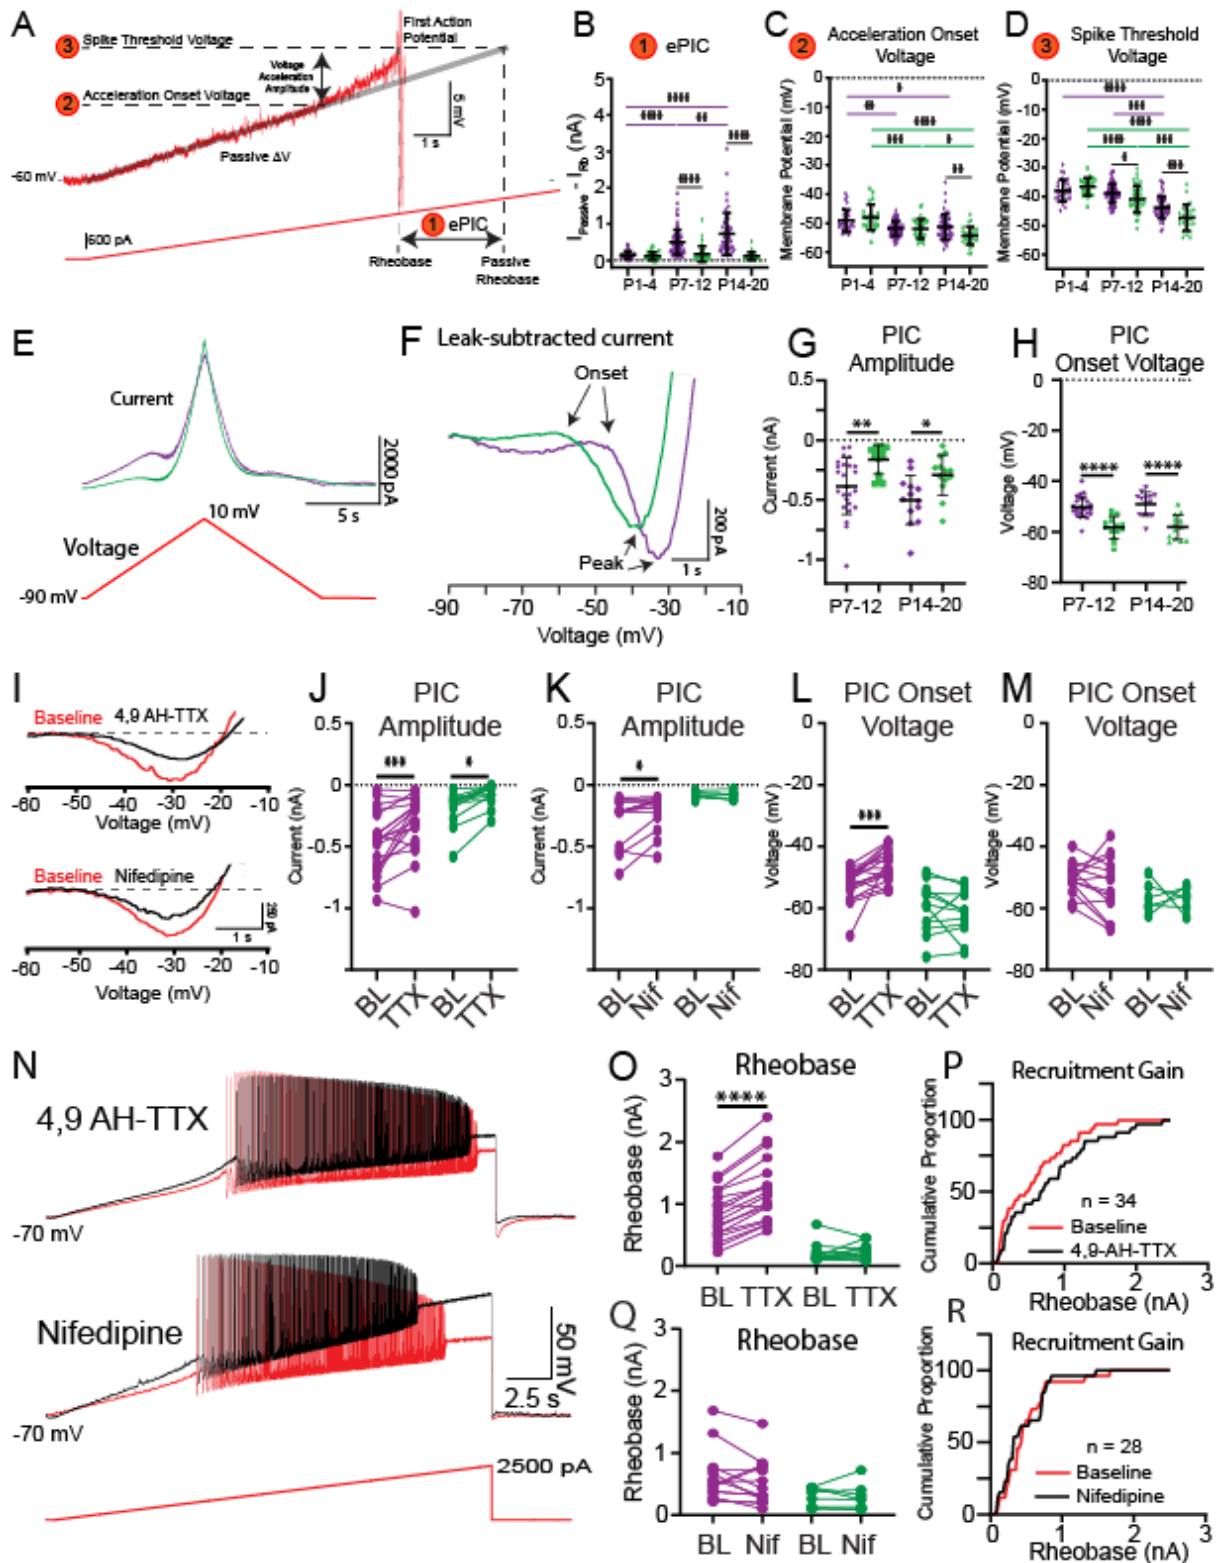

**Figure 4: Nav1.6-conducting PICs shape motoneuron activation.** A.) Rheobase was assessed using slow depolarizing current ramps (100 pA/s from -60 mV). During these ramps, the trajectory of the membrane potential approaching the spike threshold is characterised by a passive, linear phase ( $\Delta V$ : grey line) and an accelerating phase. The impact of the underlying

## Postnatal development of motoneuron activation properties

current producing the membrane potential acceleration, termed ePIC (A1, B), is estimated as the difference between the extrapolated passive and actual rheobase currents. The acceleration onset voltage (A2, C) is the voltage at which the membrane potential deviates by greater than 1 mV from the linear function fitted to the initial (passive) depolarization of the membrane potential during the ramp. The amplitude of this acceleration phase is calculated from the onset voltage to the threshold of the first action potential (A3, D). E.) Persistent inward currents (PICs) were measured in voltage clamp from delayed (purple) and immediate (green) firing motoneurons of 2-week (n = 25 Delayed; n = 14 Immediate) and 3-week (n = 14 Delayed; n = 13 Immediate) old mice using a slow depolarizing voltage ramp (10mV/s; -90 to -10 mV). F.) PIC onset and amplitude were measured from leak-subtracted, low pass filtered (5Hz Bessel) traces. G.) PICs were larger in amplitude in delayed compared to immediate firing motoneurons at both 2 and 3 weeks. H.) PIC onset was significantly more depolarized in delayed compared to immediate-firing motoneurons and did not change between weeks 2 and 3. I.) Representative traces of a PIC measured in voltage clamp from a delayed-firing motoneuron. The relative contribution of NaV1.6 and L-type calcium channels to PICs in delayed and immediate firing motoneurons was tested with 4,9-Anhydrotetrodotoxin (4,9 AH-TTX; 200 nM, Del: n = 22; Imm: n = 12) and nifedipine (20  $\mu$ M, Del: n = 16; Imm: n = 10) respectively (black traces). 4,9 AH-TTX reduced PIC amplitude of delayed and immediate firing motoneurons (J) whereas nifedipine only reduced the amplitude of delayed firing motoneurons (K). 4,9 AH-TTX depolarized PIC onset voltage of delayed firing motoneurons (L); nifedipine did not change PIC onset voltage in either subtype (M). N.) Representative traces from depolarizing current ramps of delayed firing motoneurons used to investigate changes in rheobase before (red) and after (black) blocking NaV1.6 or L-type calcium channels. O.) Blocking Nav1.6 increased the rheobase of delayed but not immediate firing motoneurons. P.) Cumulative proportion histograms for rheobase currents of delayed and immediate firing motoneurons sampled before (red) and after (black) blocking NaV1.6 channels. Blocking L-type calcium channels did not alter rheobase in either motoneuron subtype (Q) or change the recruitment gain (R). Individual data points are displayed, black bars represent mean  $\pm$  SD. Statistical analysis was conducted using a 2-way ANOVA and Holm-Sidak post hoc analysis. Asterisks denote significant differences from pairwise comparisons \* p < 0.05, \*\* p < 0.01, \*\*\* p < 0.001, \*\*\*\* p < 0.0001.

### **Hyperpolarization-activated inward currents shape the rheobase of delayed and immediate firing motoneurons after week 3**

We next considered other active properties that might contribute to the increase in rheobase current in delayed firing motoneurons between weeks 2 and 3 and further stagger rheobase currents of motoneuron subtypes. HCN channels produce a hyperpolarization-activated inward current (I<sub>h</sub>) and are key for producing rebound bursting following inhibition (Dougherty and Kiehn, 2010; Engbers et al., 2011; Wilson et al., 2005; Zhong et al., 2010). In some neurons, HCN channels are active near resting potential, producing an inward current that counteracts the hyperpolarizing influence of a potassium leak current to maintain the resting membrane potential (Bayliss et al., 1994; Kiehn et al., 2000; Kjaerulff and Kiehn, 2001; McLarnon, 1995; Perrier et al., 2003; Picton et al., 2018). Putative I<sub>h</sub>-mediated sag potentials have been described in larger spinal motoneurons of adult cats and rats (Araki et al., 1961; Burke and ten Bruggencate, 1971; Gustafsson and Pinter, 1984; Ito and Oshima, 1965; Jørgensen et al., 2020; Manuel et al., 2009; Meehan et al., 2010; Takahashi, 1990; Zengel et al., 1985), and have been suggested to decrease the mAHP; a key distinguishing feature of motoneuron subtypes. We therefore hypothesized that an increase in I<sub>h</sub> in delayed but not immediate firing motoneurons during week 3 may become important for shaping delayed firing motoneuron rheobase and therefore further refining orderly recruitment.

In line with our hypothesis, we found a prominent increase in depolarizing sag potentials measured in current clamp (Figure 5A-D) and underlying I<sub>h</sub> measured in voltage clamp (Figure 5E-G) in delayed firing motoneurons at week 3, which was abolished by the selective HCN channel blocker, ZD-7288 (10  $\mu$ M; Figure 5H-J). The overall sag conductance was estimated (g<sub>Sag</sub>) by calculating the inverse of the I-dV slope (conductance: g) at initial and steady state potentials during hyperpolarizing current steps and then compared between motoneuron subtypes across development. g<sub>Sag</sub> did not differ between motoneuron subtypes during weeks 1 and 2 but increased in delayed firing motoneurons at week 3 such that it was larger in delayed compared to immediate firing motoneurons at this point in time (Figure 5B;  $F_{(2,249)} = 5.2$ , p = 0.006). Depolarizing sag potentials (Figure 5C;  $F_{(6,103)} = 28.4$ , p < 1.0e-15) and underlying I<sub>h</sub> amplitude (Figure 5F - G;  $F_{(1,61)} = 6.1$ , p = 0.01) were larger in delayed compared to

## Postnatal development of motoneuron activation properties

immediate firing motoneurons during week 3. Notably, we find a prominent  $I_h$  in delayed firing motoneurons at -70 mV (Figure 5F;  $F_{(1,61)} = 13.4$ ,  $p = 0.005$ ), which is near the resting potential of delayed firing motoneurons ( $I_h$  -70 mV W3:  $-119 \pm 103$  pA; RMP W3:  $-66.8 \pm 3.6$  mV), and could also be blocked by ZD-7288 (Figure 5 I;  $F_{(1,17)} = 8.7$ ,  $p = 0.009$ ). The ZD7288-sensitive current, was significantly larger in delayed compared to immediate firing motoneurons at week 3 when measured at both -70 mV (Del:  $-134 \pm 101$  pA, Imm:  $-17 \pm 16$  pA;  $t_{(17)} = 3.2$ ,  $p = 0.005$ ) and -110 mV (Del:  $-1111 \pm 803$  pA, Imm:  $-452 \pm 246$  pA;  $t_{(16)} = 2.2$ ,  $p = 0.04$ ). Differences in  $I_h$  at week 3 are not due to differences in soma size as  $I_h$  density was larger in delayed compared to immediate firing motoneurons at week 3 (Supplementary Table 2;  $F_{(4,142)} = 6.5$ ,  $p = 7.7e-5$ ), but not week 2 (Supplementary Table 2;  $F_{(4,100)} = 0.3$ ,  $p = 0.9$ ). These data suggest that  $I_h$  increases, and becomes activated at more depolarized voltages, in delayed firing motoneurons by the third postnatal week.

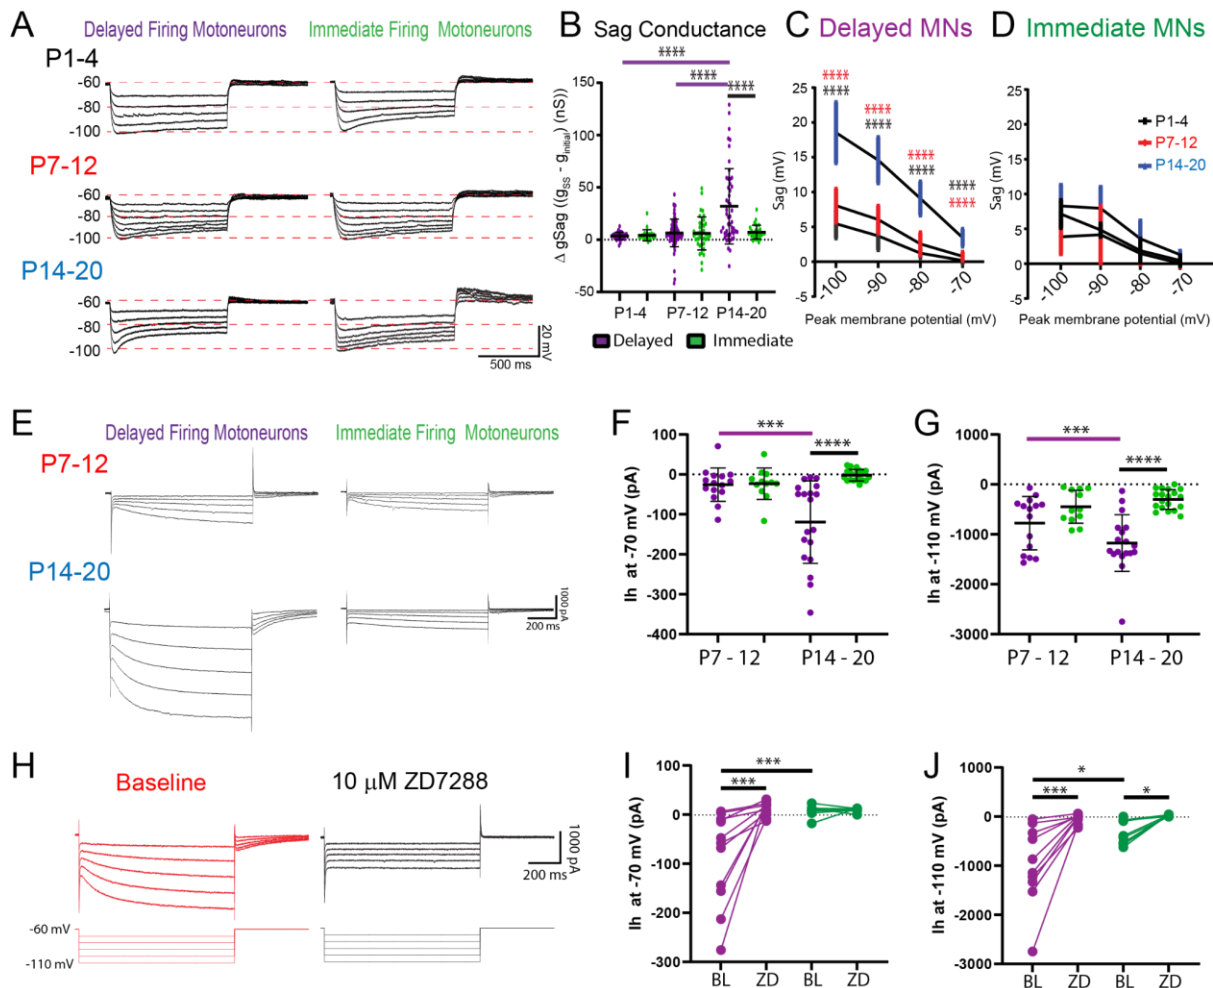

**Figure 5:  $I_h$  shapes delayed firing motoneuron activation in week 3.** A.) Sag potentials were measured from delayed (purple) and immediate-firing (green) motoneurons of mice aged P1-4 ( $n = 54$ ), P7-12 ( $n = 122$ ), and P14-20 ( $n = 81$ ). B.) The sag conductance (gSag) was estimated (eSag Conductance) during a series of hyperpolarizing current steps (1 s duration). Mean  $\pm$  SD sag potentials plotted as a function of trough of membrane potential for delayed (C.) and immediate-firing (D) motoneurons at P1-4 (black), P7-12 (red), and P14-20 (blue). E.)  $I_h$  was measured in delayed and immediate firing motoneurons during weeks 2 (Del:  $n = 15$ ; Imm:  $n = 12$ ) and 3 (Del:  $n = 19$ ; Imm:  $n = 19$ ) in voltage clamp using a series of incremental hyperpolarizing voltage steps (-60 to -110 mV, 1 s duration, 10 mV increments).  $I_h$  measured at -70 mV (F) and -110 mV (G) increased in delayed-firing motoneurons between weeks 2 and 3 and was larger in delayed compared to immediate-firing motoneurons at week 3 (H). Representative trace of  $I_h$  recorded in voltage clamp from a delayed firing motoneuron before (red trace) and after (black trace) bath application of the HCN channel blocker ZD7288 (10  $\mu$ M). ZD7288 blocked  $I_h$  in delayed-firing motoneurons measured at -70 mV (I) and  $I_h$  measured at -110 mV in both delayed ( $n = 13$ ) and

## Postnatal development of motoneuron activation properties

immediate-firing ( $n = 9$ ) motoneurons (J). Data are presented as individual points for each cell studied. Statistical analyses were conducted using 2-way ANOVA and Holm-Sidak post hoc analysis when significant effects were detected. Asterisks denote significant differences from Holm-Sidak post hoc analysis \*  $p < 0.05$ , \*\*  $p < 0.01$ , \*\*\*  $p < 0.001$ , \*\*\*\*  $p < 0.0001$ . J.) Recruitment gain represented by cumulative proportion histograms of rheobase currents of motoneurons sampled before (red) and after (black) blocking HCN channels.

Given that we find evidence for  $I_h$  becoming activated at more depolarized voltages in delayed firing motoneurons during week 3, we sought to determine if  $I_h$  might be active at resting membrane potential. We find a prominent  $h$ -current in voltage clamp mode during voltage steps from a holding potential of  $-50$  mV to the respective resting potential of each delayed firing motoneurons ( $n = 13$ ;  $I_h$  Amp =  $-96 \pm 60$  pA;  $I_h$  dens =  $-0.17 \pm 0.08$  pA/pF), which was not observed during voltage steps to resting potential in immediate firing motoneurons ( $n = 11$ ;  $I_h$  Amp =  $-0.13 \pm 11$  pA,  $I_h$  dens =  $-0.007 \pm 0.06$  pA/pF). In addition, ZD-7288 - sensitive sag potentials were found in delayed but not immediate firing motoneurons during hyperpolarizing current steps that brought the membrane potential from  $-60$  mV to their respective resting membrane potentials (Figure 6A - B;  $F_{(1,19)} = 23.7$ ,  $p = 1.1e-4$ ). Interestingly, blocking  $I_h$  with ZD-7288 hyperpolarized the resting membrane potential of both delayed and immediate firing motoneurons (Figure 6C - D:  $F_{(1,20)} = 11.0$ ,  $p = 0.003$ ), however the magnitude of this change was greater in delayed firing motoneurons (Figure 6E:  $t_{(20)} = 3.3$ ,  $p = 0.003$ ). Together these findings indicate that  $I_h$  is indeed active at resting potential in delayed but not immediate firing motoneurons.

Following the establishment of  $I_h$  at and around resting potential, we next set out to determine if  $I_h$  could influence the activation of delayed firing motoneurons.  $I_h$  measured at  $-70$  mV was larger in motoneurons with a higher rheobase current ( $r = -0.86$ ,  $p = 6.4e-7$ ) and ZD-7288 decreased the rheobase current of delayed but not immediate firing motoneurons (Figure 6F - G:  $F_{(1,20)} = 5.4$ ,  $p = 0.0002$ ), to a level where rheobase current of delayed firing motoneurons was not significantly different from that of immediate firing motoneurons at their respective baseline (Figure 6G: Holm-sidak post hoc:  $p = 0.19$ ). This non-uniform modulation of rheobase currents across motoneuron subtypes led to a 50% reduction in the rheobase current range across the sample of motoneurons studied (BL: 3227 pA; ZD7288: 1624 pA) and an increase in the recruitment gain (Figure 6H). ZD-7288 did not change the voltage threshold of the first action potential in either motoneuron subtype (Del: BL:  $-38.8 \pm 3.9$ , ZD:  $-37.8 \pm 7.4$  mV; Imm:  $-45.0 \pm 4.1$ , ZD:  $-45.2 \pm 3.4$  mV;  $F_{(1,20)} = 0.6$ ,  $p = 0.5$ ).

The effects of ZD7288 on motoneuron intrinsic properties were reproduced with a second HCN channel blocker, ivabradine ( $10 \mu\text{M}$ ;  $n = 8$  Del;  $n = 3$  Imm), which produced a  $45 \pm 18\%$  reduction in  $I_h$  measured at  $-110$  mV in delayed and immediate firing motoneurons ( $F_{(1,9)} = 11.5$ ,  $p = 0.008$ ). This reduction in  $I_h$  by ivabradine led to a hyperpolarization of the resting membrane potential of both delayed ( $\Delta\text{RMP} = -8.0 \pm 4.4$  mV) and immediate ( $\Delta\text{RMP} = -4.3 \pm 1.2$  mV) firing motoneurons ( $F_{(1,8)} = 21.2$ ,  $p = 0.002$ ). Ivabradine produced a  $26 \pm 6\%$  reduction in rheobase of delayed firing motoneurons ( $F_{(1,8)} = 11.7$ ,  $p = 0.009$ , Holm-Sidak post hoc  $p = 1.8e-4$ ) but did not significantly change the rheobase of immediate firing motoneurons (Holm-Sidak post hoc  $p = 0.6$ ), or spike threshold in either subtype ( $F_{(1,8)} = 1.0$ ,  $p = 0.3$ ).

Together these results indicate that delayed firing motoneurons express a prominent  $I_h$  that is active at resting membrane potential and can shape their activation. Further, differential maturation of  $I_h$  in delayed versus immediate firing motoneurons may contribute to the expansion of the activation range from postnatal weeks 2 to 3.

## Postnatal development of motoneuron activation properties

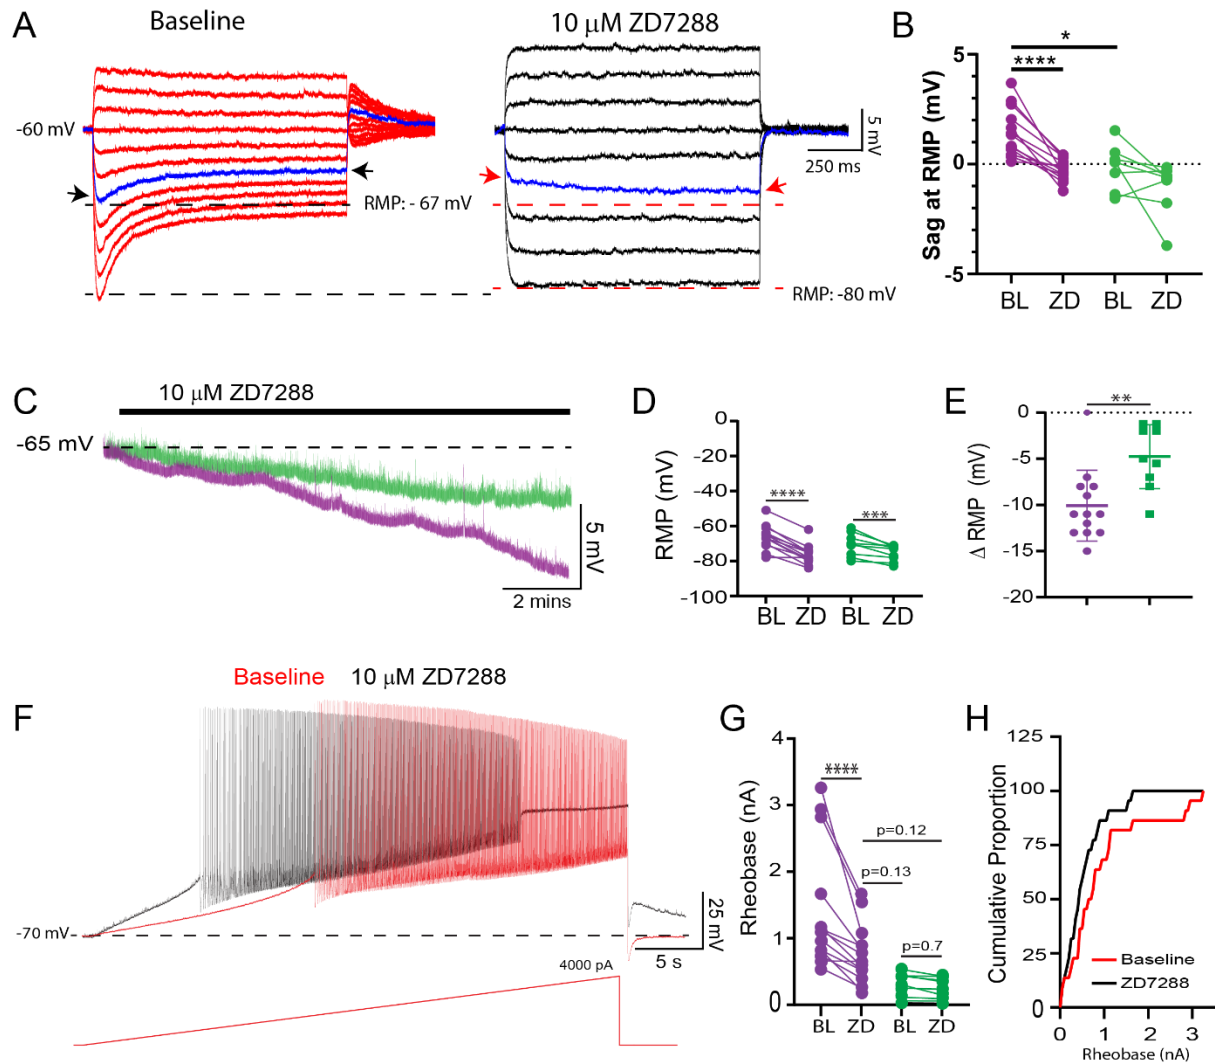

**Figure 6: A resting  $I_h$  increases rhebase of delayed firing motoneurons at week 3:** A.) Representative trace of depolarizing sag potentials in a delayed firing motoneuron during negative current steps that brought the membrane potential from -60 mV to resting potential (-67 mV) for this cell, which could be blocked by the HCN channel blocker ZD-7288 (black trace). The individual blue traces and arrows highlight a depolarizing sag from resting potential at baseline which turns into a slow hyperpolarizing potential following application of ZD7288. B.) ZD7288-sensitive depolarizing sag potentials were found at resting membrane potential in delayed ( $n = 13$ ; purple) but not immediate ( $n = 9$ ; green) firing motoneurons. C.) Representative traces of the resting membrane potential (RMP) of delayed and immediate firing motoneurons from lumbar slices of P14-20 mice during blockade of HCN channels with ZD7288. D.) ZD7288 hyperpolarized the RMP of both delayed and immediate firing motoneurons; however, the magnitude of the hyperpolarization was larger in delayed-firing motoneurons (E: unpaired t-test). F.) Representative voltage trace of a delayed firing motoneuron during a slow depolarizing (100 pA/s) current ramp before (red) and after (black) ZD7288. G.) ZD7288 reduced the rhebase current of delayed but not immediate firing motoneurons. Data are presented as individual points for each cell studied. Statistical analyses were conducted using 2-way ANOVA and Holm-Sidak post hoc analysis when significant effects were detected. Asterisks denote significant differences from Holm-Sidak post hoc analysis \*  $p < 0.05$ , \*\*  $p < 0.01$ , \*\*\*  $p < 0.001$ , \*\*\*\*  $p < 0.0001$ . H.) Recruitment gain represented by cumulative proportion histograms of rhebase currents of motoneurons sampled before (red) and after (black) blocking HCN channels.

## Discussion

We set out to address whether motoneuron recruitment, which we assayed based on the current required to elicit repetitive firing (rheobase), is purely dependent on passive properties, as would be predicted by the size principle, or whether functional classes of spinal motoneurons possess distinct electrophysiological properties that help ensure orderly recruitment of motoneuron subtypes. We used postnatal development of the mouse as a model to dissect the relative importance of motoneuron intrinsic properties to the establishment of orderly recruitment during the emergence of fine motor control. The rate at which motoneurons within a motor pool are recruited is important because it defines the recruitment gain and influences the relative degree of precision or vigour of movement (Cope and Pinter, 1995; Kernell and Hultborn, 1990; Nielsen et al., 2019). We reveal novel roles for specific ion channels in shaping motoneuron subtype recruitment and demonstrate sequential integration of these intrinsic properties during postnatal development. These findings are of broad importance given that orderly recruitment of motoneurons is conserved across phyla (Ampatzis et al., 2013; Azevedo et al., 2020; Bawa et al., 1984; Burke et al., 1973; Gabriel et al., 2011; Gardiner, 1993; Gustafsson and Pinter, 1984; Henneman, 1957; Leroy et al., 2015, 2014; Manuel et al., 2009; Martínez-Silva et al., 2018; McLean et al., 2007; Zwart et al., 2016), and differences in the intrinsic properties of motoneuron subtypes lead to increased susceptibility to degeneration in disease (Fuchs et al., 2013; Kaplan et al., 2014; Leroy et al., 2014; Martínez-Silva et al., 2018; Nijssen et al., 2017) subsequently producing motor dysfunction as a consequence of alterations in recruitment gain within motor pools (Dengler et al., 1990; Hu et al., 2015; Thomas et al., 2014).

We identified putative fast and slow type motoneurons based on delayed and immediate repetitive firing profiles respectively; an approach that has been previously validated using molecular markers (chondrolectin and matrix metalloproteinase-9 for fast motoneurons; estrogen-related receptor Beta (ERR $\beta$ ) for slow type motoneurons (Enjin et al., 2010; Kaplan et al., 2014; Leroy et al., 2014). In line with the initial studies using this approach (Leroy et al., 2014), we find that at similar ages (P7-14) delayed firing motoneurons have a lower input resistance, higher rheobase, more depolarized spike threshold, shorter action potentials, and shorter mAHPs compared to immediate firing motoneurons. Given the consistencies between the electrophysiological properties of motoneuron subtypes in our study, and those previously reported and validated by others (Leroy et al., 2014; Martínez-Silva et al., 2018), it is likely that the two subtypes that we studied represent fast and slow motoneurons. However, we cannot rule out the possibility that gamma motoneurons were included in our samples given the lack of clear physiological markers to identify this subtype. A table comparing motoneuron intrinsic properties across studies can be found in Supplementary Table 3.

Our results suggest that motoneuron recruitment is multifaceted, with multiple layers that establish orderly recruitment of functionally defined spinal motoneuron subtypes. The size principle forms a foundation with recruitment directed by physical properties of neurons. We find that the rheobase current is driven primarily by the physical properties of neurons during the first postnatal week, as would be predicted by the size principle, but the rheobase is not linked to the functional subtypes of motoneurons. A steep recruitment gain within a motor pool, with no differentiation between the recruitment of motoneuron subtypes, may be important to facilitate the rapid, ballistic movements, which are typically observed in new-born mice prior to the onset of finer motor control. These findings are consistent with those in human babies where rapid movements are supported by synchronized recruitment of motor unit subtypes to accommodate for the slower and more homogenous muscle twitch properties at early postnatal stages (Vecchio et al., 2020), which have also been reported in neonatal rodents (Close, 1964). Synchronized motoneuron recruitment may also support ongoing maturation of

## Postnatal development of motoneuron activation properties

spinal circuits and neuromuscular junctions during early postnatal development (Hanson et al., 2004) when poly-neuronal innervation of muscle fibres (Bennett et al., 1983; Brown et al., 1976), in addition to gap junction (Chang et al., 1999; Personius et al., 2007; Walton and Navarrete, 1991) and glutamatergic coupling (Bhumbra and Beato, 2018) between motoneurons remains prevalent.

Rheobase currents of motoneuron subtypes become staggered during the second postnatal week, when finer motor control develops, such as hindlimb weight-bearing during stepping. This separation of rheobase coincided with the diversification of motoneuron subtypes as revealed by our principal component analysis and is supported by previous work (Nakanishi and Whelan, 2010). A portion of this staggered rheobase current relates to differential maturation of passive properties, with delayed firing motoneurons increasing in size, as indexed by whole cell capacitance, leading to a decrease in input resistance. This finding is in line with previous reports demonstrating increases in motoneuron physical size during the first two postnatal weeks (Carrascal et al., 2005; Li et al., 2005; Vinay et al., 2000b). However, previous work in adult cat motoneurons, suggests that variation in cell size or input resistance cannot account for the full range of rheobase currents across a motor pool (Fleshman et al., 1981). Similarly, work in rat oculomotor neurons has demonstrated changes in rheobase during development that are linked to maturation of spike threshold and not changes in input resistance (Carrascal et al., 2011), suggesting that such observations are not species-specific. In addition to passive properties related to size, we found that active properties, determined by specific ion channels, differed between motoneuron subtypes, and changed during development. This observation suggested that changes in active properties may also contribute to the rheobase separation of motoneuron subtypes from the second postnatal week onwards. These active properties produce non-linearities in the input-output functions of motoneurons, based on distinct activation and inactivation properties of voltage-sensitive ion channels. The developmental emergence of a role for active properties in motoneuron recruitment may provide more flexible motor output than would be possible if recruitment was based on a fixed set of physical parameters such as motoneuron size. The integration of active properties may permit for more adaptable schemes of motoneuron recruitment as more complex motor behaviours emerge during later stages of postnatal development.

We first found that persistent inward currents (PICs) differentially influence rheobase of motoneuron subtypes from the second postnatal week. PICs are well described in motoneurons (Heckman et al., 2008b; Hounsgaard et al., 1988; Hounsgaard and Kiehn, 1989; Li and Bennett, 2003; Quinlan et al., 2011; Schwindt and Crill, 1980, 1977) where they amplify synaptic inputs to distal dendrites (Carlin et al., 2009, 2000; Heckman et al., 2008a) and are critical for the generation of repetitive firing (Bouhadfane et al., 2013; Kuo et al., 2006; Miles et al., 2005). In some cases, PICs also produce plateau potentials and lead to bistability, which can sustain repetitive firing following the termination of excitatory synaptic input (Lee and Heckman, 1998b). We expected to find larger PICs in slow motoneurons given their lower rheobase currents and greater tendency for bistability (Lee and Heckman, 1998a), which is thought to be important for the maintenance of posture. However, we found that PIC amplitude was larger in delayed compared to immediate firing motoneurons, although when correcting for cell size we found no difference in PIC density between subtypes. Further analyses revealed a difference in the activation voltages of PICs across motoneuron subtypes, with PICs activating at more depolarised potentials in delayed firing motoneurons. These data support that variations in the activation voltage of PICs help drive differential recruitment across motoneuron subtypes. Our findings are also consistent with work in adult cats, which show that a more hyperpolarized PIC activation voltage in smaller motoneurons is a better predictor of bistability than PIC amplitude (Lee and Heckman, 1998a). While we rarely observed bistability or self-sustained firing, it is possible that the population of immediate firing motoneurons in our study may be more prone to



## Postnatal development of motoneuron activation properties

bistability in the presence of neuromodulation, such as is included in other studies (Hounsgaard et al., 1988; Hounsgaard and Kiehn, 1985; Lee and Heckman, 1998a).

PICs are produced by a complement of ion channels that conduct sodium and calcium currents. Our pharmacological analysis demonstrated that NaV1.6 channels contribute to the PIC in both motoneuron subtypes, with an additional contribution of L-type calcium channels in delayed firing motoneurons. Although it is important to note that additional ion channels, and their differential expression may contribute to the differences in properties of PICs in motoneuron subtypes (Bouhadfane et al., 2013). Notably, we find that blockade of NaV1.6 and L-type calcium channels only produced a combined 53% reduction in PIC amplitude in delayed firing motoneurons, and blockade of NaV1.6 produced a 60% reduction in PIC amplitude of immediate firing motoneurons. We found that NaV1.6, rather than L-type calcium channels, determines the PIC activation voltage, and shapes rheobase of delayed firing motoneurons by controlling the voltage trajectory up to and including spike threshold. This is in line with previous experimental (Kuo et al., 2006) and computational work (Zhang and Dai, 2020). NaV1.6 channels are well-placed to control rheobase, given their dense expression at the axon initial segment (AIS) (Brocard et al., 2016; Jørgensen et al., 2020), a specialized structure that is critical for the generation of action potentials and support of repetitive firing. Physical properties of the AIS may also contribute to differential recruitment of motoneuron subtypes, given that the AIS is further from the soma in fast compared to slow motoneurons (Rotterman et al., n.d.). If so, one might predict that the distance between soma and AIS may increase in fast motoneurons during the first two postnatal weeks and contribute to functional specification of motoneuron subtypes.

Interestingly, while blocking NaV1.6 reduced the overall PIC amplitude and depolarized spike threshold in immediate firing motoneurons, it did not alter the onset voltage of the PIC or change their rheobase, which is supportive of PIC onset voltage being more important for shaping rheobase. One possibility is that PIC onset and rheobase in immediate firing motoneurons are controlled by other ion channels (Bouhadfane et al., 2013). However, roles for calcium PICs in shaping motoneuron recruitment cannot be excluded in either motoneuron subtype and may have been underestimated in our transverse slice preparations due to a loss of key neuromodulatory sources that increase calcium PICs (Conway et al., 1988; Hounsgaard et al., 1988; Hounsgaard and Kiehn, 1985; Li et al., 2007), loss of dendrites in our slice preparations where L-type calcium channels are clustered (Carlin et al., 2000; ElBasiouny et al., 2005), and the nature of the approaches where recruitment was assessed; with current injected at the soma being more likely to activate Nav1.6 channels on the AIS before calcium channels of the dendrites.

Other channels, including Kv1.2 channels, which underlie the characteristic delayed firing behaviour of fast motoneurons (Bos et al., 2018; Leroy et al., 2015, 2014), are also clustered at the AIS and may dynamically interact with NaV1.6 channels to shape rheobase. We found delayed firing motoneurons at all ages studied; however, changes in the expression of the underlying Kv1.2 channels that produce this firing behaviour, and the compartmental distribution of these channels, may contribute to changes in recruitment of motoneuron subtypes. Furthermore, NaV1.6-conducting sodium PICs are opposed by outward-conducting M-type potassium currents mediated by Kv7 channels that are located on the AIS of excitatory spinal interneurons. Given that M-type currents can influence measurements of PICs in voltage clamp mode and oppose the physiological roles of sodium PICs in the generation of locomotor rhythmogenesis (Verneuil et al., 2020), and could also influence motoneuron recruitment. We cannot rule out potential roles for potassium channels in the differential maturation of motoneuron subtype recruitment, given that these conductances were not blocked in our study.

## Postnatal development of motoneuron activation properties

We found that rheobase of delayed firing motoneurons increased further from the third postnatal week, paralleling the emergence of more complex locomotor behaviours, similar to those seen in adults (Altman and Sudarshan, 1975). However, this increase in delayed firing motoneuron rheobase could not be accounted for by changes in passive properties or PICs. Instead, we found subtype-specific changes in a hyperpolarization-activated inward current (I<sub>h</sub>) that we hypothesized may contribute to this further refinement of delayed firing motoneuron rheobase. I<sub>h</sub> is a non-specific inward current conducted by HCN channels, which are located on the somata and proximal dendrites of larger motoneurons in the rodent spinal cord (Milligan et al., 2006). Although depolarizing sag potentials (Delestrée et al., 2014; Gustafsson and Pinter, 1984; Ito and Oshima, 1965; Kiehn et al., 2000; Manuel et al., 2009; Meehan et al., 2010) and developmental changes in I<sub>h</sub> have been reported previously in motoneurons (Bayliss et al., 1994; Russier et al., 2003; Tsuzuki et al., 1995), the functional significance of these findings was unclear. We found a prominent increase in I<sub>h</sub> density, measured at voltages near resting membrane potential (-70 mV), in delayed but not immediate firing motoneurons and evidence of a significant h-current measured at the resting potential of delayed firing motoneurons at week 3. Blocking HCN channels with ZD7288 or ivabradine, led to a decrease in rheobase of delayed but not immediate firing motoneurons when depolarizing ramps were initiated from a membrane potential of -70 mV. A high conductance state produced by a significant h-current that is active at resting potential could diminish the influence of excitatory synaptic input and delay the recruitment of fast motoneurons by acting as a shunting conductance. Recruitment may be further delayed due to the progressive loss of inward h-current during depolarization of the membrane potential. Importantly, the resting membrane potential is dynamic, and the influence of I<sub>h</sub> on fast motoneuron recruitment will become diminished at more depolarized potentials. However, motoneurons are also often hyperpolarized below -70 mV during periods of inhibition, with fast motoneurons receiving a higher density of inhibitory synaptic inputs compared to slow motoneurons (Allodi et al., 2021). Therefore, the differential weighting of synaptic and intrinsic properties may be a key feature that contributes to the differential recruitment of motoneuron subtypes.

In addition to decreasing the rheobase of delayed firing motoneurons, both ZD-7288 and ivabradine also hyperpolarized the resting membrane potential of both motoneuron subtypes, albeit to a much smaller extent in immediate compared to delayed firing motoneurons. These data suggest that I<sub>h</sub> may contribute to the resting membrane potential of both motoneuron subtypes. However, hyperpolarization of the resting potential of immediate firing motoneurons by the two HCN channel blockers was perhaps unexpected given that we found no detectable h-current at voltages near resting membrane potential in this motoneuron subtype. It is possible that other currents that oppose I<sub>h</sub> may occlude its clear measurement in immediate firing motoneurons (Buskila et al., 2019; Kjaerulff and Kiehn, 2001; MacLean et al., 2003; Picton et al., 2018) and that the contribution of I<sub>h</sub> is only revealed following application of ZD-7288 or ivabradine. In support of this possibility, we observed a slow hyperpolarization of the membrane potential during negative current steps in both immediate firing motoneurons at baseline and in delayed firing motoneurons in the presence of ZD-7288 (Figure 6A). Alternatively, space clamp issues due to the large surface area and dendritic arbor of motoneurons may have led to the underestimation of h-currents. While it is expected that this error would have been greatest in the larger delayed firing motoneurons, it is possible that this error might have been sufficient to mask the small, but significant h-current in immediate firing motoneurons.

Overall, this further refinement of motoneuron subtype recruitment due to changes in I<sub>h</sub> during the third postnatal week may not only support orderly recruitment but may also be important for decreasing the recruitment gain of the motoneuron pool to support complex motor behaviours that require a higher degree of precision compared to earlier developmental stages (Figure 7).

## Postnatal development of motoneuron activation properties

### A. Locomotor behaviour

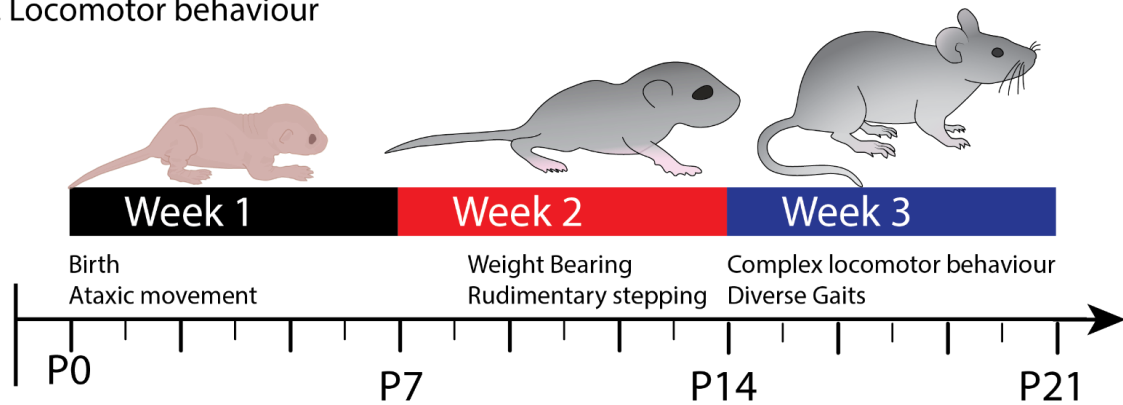

### B. Motoneuron physical properties

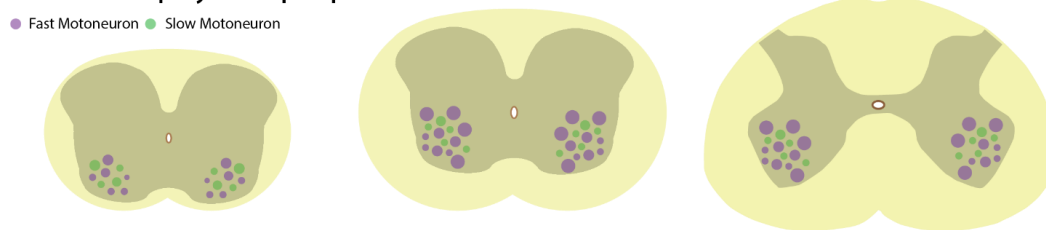

### C. Motoneuron recruitment

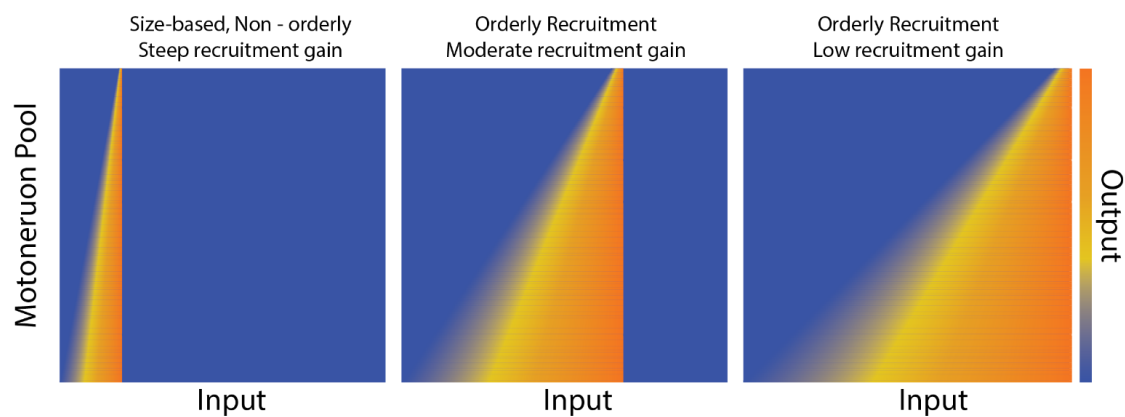

### D. Currents that shape recruitment

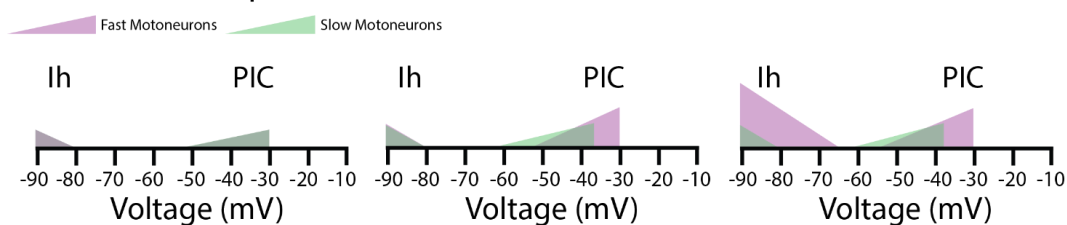

**Figure 7:** Schematic summarizing changes in the physical properties, recruitment, and underlying currents in motoneuron subtypes that shape the orderly recruitment and recruitment gain of motoneurons during postnatal development as complex locomotor behaviours emerge. A. Illustrates the time course over which locomotor behaviours mature during the first three weeks of postnatal development. B. Depicts the increase in the size of fast, but not slow motoneurons during the first two postnatal weeks, with no further increases into the third. C. The range of inputs over which a motor pool is recruited expands across the first three weeks of postnatal development. D. The expansion of the recruitment range coincides with the maturation of persistent (PIC) and hyperpolarization-activated (Ih) inward currents. Fast motoneurons and their underlying currents are depicted in purple and slow motoneurons, and their underlying currents depicted in green.

## Postnatal development of motoneuron activation properties

Our analysis provides novel insight into mechanisms that shape the rheobase and may contribute to the orderly recruitment of motoneuron subtypes, extending our understanding of the mechanisms controlling the gradation of muscle force beyond the size principle. Motoneuron subtypes also differ in synaptic properties including the circuit of origin, synaptic weight, and neurotransmitter release dynamics (Binder et al., 2002; Gabriel et al., 2011; McLean et al., 2007; Song et al., 2020). For example, synaptic inputs originating from a variety of premotor sources may terminate on different motoneuron compartments that are associated with clusters of specific ion channels. Therefore, synapses that terminate on distal dendrites compared to more proximal loci, such as the proximal dendrites, soma, or AIS, may engage different voltage-sensitive ion channels leading to differential recruitment. It is likely that functionally specified motor pools may rely on varying degrees of synaptic and intrinsic properties to tune recruitment gain. Furthermore, differential control of intrinsic and synaptic properties of motoneuron subtypes by neuromodulators likely also adjust recruitment gain within or across motor pools (Bertuzzi and Ampatzis, 2018; Jha and Thirumalai, n.d.).

Given the new roles that we show here for PICs and  $I_h$  in the differential control of motoneuron subtypes, it is possible that neuromodulation of these currents (Conway et al., 1988; Harvey et al., 2006b; Hounsgaard et al., 1988; Kjaerulff and Kiehn, 2001; Reville et al., 2019; Sirois et al., 2002), as descending sources of neuromodulators reach the lumbar spinal cord during development (Bregman, 1987; Commissiong, 1983), may not only shape the emergence of orderly recruitment (Pflieger et al., 2002; Smith and Brownstone, 2020; Vinay et al., 2005, 2002, 2000a), but also provide a means to dynamically modulate recruitment gain.

We set out to identify key intrinsic properties, and the underlying currents, that shape motoneuron rheobase and aimed to determine when these currents are integrated during postnatal development to establish recruitment order amongst motoneuron subtypes. Our results support the notion that fast motoneurons are not simply scaled up slow motoneurons (Kernell and Zwaagstra, 1981). While passive properties linked to motoneuron size (i.e., capacitance, input resistance) do help to stagger the recruitment of fast and slow motoneurons, we also reveal a key role for active properties, produced by PICs and  $I_h$ , which are sequentially integrated during the first three weeks of postnatal development in parallel with the emergence of increasingly complex motor behaviours. Our work will inform future studies aimed toward understanding mechanisms that enable the balance of motor control to shift between the generation of vigorous movements versus precision movements, as is needed during development and when adapting to different motor tasks.

**Acknowledgements:** We are grateful for guidance from Dr. Marco Beato and Dr. Filipe Nascimento on approaches to prepare lumbar slices from functionally mature mice and Frankie Sorrell for comments on an earlier version of the manuscript.

**Funding:** We acknowledge fellowship support to SAS from The Royal Society (Newton International Fellowship: NIF/R1/180091) and the Natural Sciences and Engineering Research Council of Canada (NSERC-PDF-517295-2018).

**Contributions:** S.A.S. performed experiments, analyzed the data, prepared figures, and wrote the first draft of the manuscript. S.A.S. and G.B.M conceived and designed the research, interpreted results, and revised and approved the final version of the manuscript.

## Methods

### *Animals*

Experiments were performed on tissue obtained from 133 (male: n = 68; and female: n = 65) wild type C57 Black J/6 mice at postnatal days (P) 1-20. All procedures performed were conducted in accordance with the UK Animals (Scientific Procedures) Act 1986 and were approved by the University of St Andrews Animal Welfare Ethics Committee.

### *Tissue preparation*

All animals were sacrificed by performing a cervical dislocation followed by rapid decapitation. Animals were eviscerated and pinned ventral side up in a dissecting chamber lined with silicone elastomer (Sylgard) filled with carbogenated (95% oxygen, 5% carbon dioxide), ice-cold (1-2 degrees Celsius) potassium gluconate based dissecting/slicing aCSF (containing in mM: 130 K-gluconate, 15 KCl, 0.05 EGTA, 20 HEPES, 25 D-glucose, 3 kynurenic acid, 2 Na-pyruvate, 3 myo-inositol, 1 Na-L-ascorbate; pH 7.4, adjusted with NaOH; osmolarity approximately 345 mOsm). Spinal cords were exposed by performing a ventral laminectomy, cutting the ventral roots and gently lifting the spinal cord from the spinal column. Spinal cords were removed within 3 - 5 minutes following cervical dislocation. Spinal cords were secured directly to an agar block (3 % agar) with VetBond surgical glue (3M) and glued to the base of the slicing chamber with cyanoacrylate adhesive. The tissue was immersed in pre-carbogenated ice-cold dissecting/slicing aCSF. Blocks of frozen slicing solution were also placed in the slicing chamber to keep the solution around 1-2 degrees Celsius. On average, the first slice was obtained within 10 minutes of decapitation which increased the likelihood of obtaining viable motoneurons in slices. 300  $\mu$ m transverse slices were cut at a speed of 10  $\mu$ m/s on the vibratome (Leica VT1200) to minimize tissue compression during slicing. 3-4 slices were obtained from each animal. Slices were transferred to a recovery chamber filled with carbogenated pre-warmed (35 degrees Celsius) recovery aCSF (containing in mM: 119 NaCl, 1.9 KCl, 1.2 NaH<sub>2</sub>PO<sub>4</sub>, 10 MgSO<sub>4</sub>, 1 CaCl<sub>2</sub>, 26 NaHCO<sub>3</sub>, 20 glucose, 1.5 kynurenic acid, 3% dextran) for thirty minutes after completion of the last slice which took 10 -15 minutes on average. Following recovery, slices were transferred to a chamber filled with carbogenated warm (35 degrees Celsius) recording aCSF (containing in mM: 127 NaCl, 3 KCl, 1.25 NaH<sub>2</sub>PO<sub>4</sub>, 1 MgCl<sub>2</sub>, 2 CaCl<sub>2</sub>, 26 NaHCO<sub>3</sub>, 10 glucose) and allowed to equilibrate at room temperature (maintained at 23-25 degrees Celsius) for at least one hour before experiments were initiated.

### *Whole cell patch clamp electrophysiology*

Whole cell patch clamp recordings were obtained from 345 lumbar motoneurons. We typically recorded from 2 cells (mode), with a range of 1-6 cells per animal. Slices were stabilized in a recording chamber with fine fibres secured to a platinum harp and visualized with a 40x objective with infrared illumination and differential interference contrast. A large proportion of the motoneurons studied were identified based on location in the ventrolateral region with somata greater than 20  $\mu$ m. Recordings were obtained from a subset of motoneurons that had been retrogradely labelled with Fluorogold (Fluorochrome, Denver, CO). Fluorogold was dissolved in sterile saline solution and 0.04 mg/g injected intraperitoneally 24-48 hours prior to experiments (Miles et al., 2005). In addition to recording from larger FG-positive cells, this approach allowed us to more confidently target smaller motoneurons. Motoneurons were visualized and whole cell recordings obtained under DIC illumination with pipettes (L: 100  $\mu$ m, OD: 1.5 mm, ID: 0.84 mm; World Precision Instruments) pulled on a Flaming Brown micropipette puller (Sutter instruments P97) to a resistance of 2.5-3.5 M $\Omega$ . Pipettes were back-filled with intracellular solution (containing in mM: 140 KMeSO<sub>4</sub>, 10 NaCl, 1 CaCl<sub>2</sub>, 10 HEPES, 1 EGTA, 3 Mg-ATP and 0.4 GTP-Na<sub>2</sub>; pH 7.2-7.3, adjusted with KOH).

## Postnatal development of motoneuron activation properties

Signals were amplified and filtered (6 kHz low pass Bessel filter) with a Multiclamp 700 B amplifier, acquired at 20 kHz using a Digidata 1440A digitizer with pClamp Version 10.7 software (Molecular Devices) and stored on a computer for offline analysis.

### *Identification of fast and slow motoneuron types*

Motoneuron subtypes were identified using a protocol established by Leroy et al., (2015, 2014), which differentiates motoneuron type based on the latency to the first spike when injecting a 5 second square depolarizing current near the threshold for repetitive firing. Using this approach we were able to identify 2 main firing profiles - a delayed repetitive firing profile with accelerating spike frequency, characteristic of fast-type motoneurons, and an immediate firing profile with little change in spike frequency, characteristic of slow-type motoneurons (Figure 1; (Leroy et al., 2015, 2014)). Delayed and immediate firing motoneurons were identified in equal proportions at each developmental time point studied (Week 1: Delayed: 58% Immediate: 42%; Week 2: Delayed: 67% Immediate: 33%; Week 3: Delayed: 65% Immediate: 35%) and were found in rostral and caudal segments of male and female mice. There were no apparent differences in the relative proportions of the two motoneuron types when comparing spinal segment or animal sex. Data analysis was performed whilst blinded to motoneuron subtype.

All motoneuron intrinsic properties were studied by applying a bias current to maintain the membrane potential at -60 mV, or at -70 mV for the subset of experiments with Ih or PIC blockers. Values reported are not liquid junction potential corrected to facilitate comparisons with previously published data (Durand et al., 2015; Miles et al., 2007; Nascimento et al., 2020, 2019; Quinlan et al., 2011; Smith and Brownstone, 2020). Cells were excluded from analysis if access resistance was greater than 20 M $\Omega$  or changed by more than 5 M $\Omega$  over the duration of the recording, if resting membrane potential deviated by more than 5 mV over the duration of the recording period, or if spike amplitude measured from threshold (described below) was less than 60 mV.

### *Pharmacology*

We deploy pharmacological tools to probe the contribution of ion channels contributing to persistent inward currents (PICs) and hyperpolarization activated inward currents (Ih). Nifedipine (20  $\mu$ M; Tocris) was used to assess the contribution of L-type calcium channels, and 4,9 - Anhydro Tetrodotoxin (200 nM; Tocris) to assess the contribution of NaV1.6 channels to PIC and recruitment. Ih was blocked with the selective HCN channel blocker, ZD-7288 (10  $\mu$ M; Tocris) or ivabradine (10  $\mu$ M; Tocris).

### *Data acquisition and analysis*

Passive properties including capacitance, membrane time constant ( $\tau$ ), and passive input resistance ( $R_i$ ) were measured during a hyperpolarizing current pulse that brought the membrane potential from -60 to -70 mV. Input resistance was measured from the initial voltage trough to minimize the impact of slower acting active conductances (eg. Ih, sag). The time constant was measured as the time it took to reach 2/3 of the peak voltage change. Capacitance was calculated by dividing the time constant by the input resistance ( $C = \tau/R$ ). Resting membrane potential was measured 10 minutes after obtaining a whole cell configuration and at the end of recordings from the MultiClamp Commander.

Rheobase and repetitive firing properties were assessed during slow (100 pA/s) depolarizing current ramps which allowed us to measure the recruitment current and voltage threshold of the first action potential. Rheobase was also measured during long (5s) depolarizing current steps that were used to determine the motoneuron firing type (delayed or immediate) and defined as the first current step to produce at least 3 action potentials. Recruitment gain was qualitatively illustrated by generating

## Postnatal development of motoneuron activation properties

cumulative proportion histograms of recruitment current values across respective motoneuron samples at developmental time points or before and after drug application. The voltage threshold of the first action potential was defined when the change in voltage reached 10 mV/ms. Firing rates were measured at rheobase, 2 times rheobase, and derecruitment (maximum firing rate). As previously reported, motoneurons displayed sub primary and primary regions of the FI relationship. Sub primary range gain was measured from the slope of a linear function fitted to the initial section of the FI relationship (Jensen et al., 2018; Manuel et al., 2009; Meehan et al., 2010). We did not find evidence for a secondary firing range in the motoneurons studied.

The subthreshold trajectory of the membrane potential measured in response to a slow depolarizing current ramp is composed of passive and active elements defined by linear and exponential changes in membrane potential respectively (Delestrée et al., 2014; Jørgensen et al., 2020; Kuo et al., 2006). The slope of this linear phase was calculated as a proxy for passive excitability. The onset of the active, exponential component of the membrane depolarisation was defined as the point at which the membrane potential deviated by more than 1 mV from the linear function of the passive phase. The current and voltage values at the onset of the voltage acceleration were compared to the rheobase current and voltage threshold measured from the first action potential elicited on the depolarising current ramp. A hypothetical 'passive rheobase' current was then estimated by extrapolating the line applied to the passive depolarising phase and measuring its intersection with the voltage threshold of the first spike. The difference between this hypothetical passive rheobase current and the measured rheobase current was calculated to quantify the influence that active conductances (presumably persistent inward current) have on recruitment.

The influence that persistent inward currents (PICs) exert on motoneuron excitability was also estimated in current clamp mode using the injection of a triangular, depolarizing current ramp with 5 second rise and fall times (Durand et al., 2015; Leroy et al., 2015; Li and Bennett, 2003; Steele et al., 2020). Depolarizing current ramps were set to a peak current of 2 times repetitive firing threshold current (determined with a 100pA/s depolarizing current ramp initiated from -60 mV). The influence of persistent inward currents on motoneuron excitability was estimated by calculating the difference ( $\Delta I$ ) between the current at firing onset on the ascending component of the ramp and the current at derecruitment on the descending component of the ramp. A negative  $\Delta I$  is suggestive of a PIC. Firing hysteresis was also assessed on the ascending and descending components of the ramp. We subdivided cells into 1 of 4 types based on the firing hysteresis on ascending and descending portions of the ramp (Bennett et al., 1998; Cotel et al., 2009; Durand et al., 2015; Li and Bennett, 2003) (Type 1: Linear, Type 2: Adapting, Type 3: Sustained, Type 4: Counter clockwise).

PICs were measured in voltage clamp by injecting a slow depolarizing voltage ramp (10 mV/s from -90 to -10 mV) over 8 seconds (Huh et al., 2021; Quinlan et al., 2011; Steele et al., 2020). PIC onset voltage, voltage at which the peak current occurs (voltage peak), peak current amplitude, and peak current density were measured from post-hoc leak-subtracted traces as in (Quinlan et al., 2011; Steele et al., 2020; Verneuil et al., 2020).

Input resistance was calculated by taking the slope of the current-voltage relationship at initial (peak voltage trough at the start) and steady state (plateau at end) voltage deflection during a series of 1 second hyperpolarizing current steps. Sag conductances were estimated as the difference in conductance ( $1/R$ ) measured during initial and steady state voltage plateau at the end of hyperpolarizing current steps ( $(1/R_{in,ss}) - (1/R_{in,initial})$ ).  $I_h$  was measured in voltage clamp during 1 second hyperpolarizing voltage steps from -60 mV to -110 mV, in 10 mV increments. A resting  $I_h$  was also measured by stepping the

## Postnatal development of motoneuron activation properties

voltage down from a holding potential of -50 mV to the respective resting membrane potential of a given cell in a subset of motoneurons.  $I_h$  was measured as the difference between the initial and steady state current within similar windows analyzed for depolarizing sag in current clamp.  $I_h$  time constant ( $\tau$ ) was measured as the time (in ms) to reach 2/3 peak  $I_h$  at each respective voltage step.

Single spike (spike threshold, amplitude, rise time, half width) and afterhyperpolarization (AHP) (amplitude and half width) were elicited using a 10 ms square, depolarising current pulse applied at an intensity 25% above rheobase current. Spike threshold was determined as the potential at which the derivative ( $dV/dt$ ) increased above 10 mV/ms. Spike amplitude, rise time, and half width were measured from this point. Medium afterhyperpolarization (mAHP) properties (amplitude and half width) were measured from baseline (-60 mV). Single spike and mAHP properties were measured using event detection features in Clampfit Version 11 (Molecular Devices).

### *Research design and statistical analysis*

Two factor analysis of variance (ANOVA) was performed with motoneuron type (delayed and immediate) and postnatal week (Week 1, 2, 3) as factors to address 3 core questions for each parameter studied: 1.) Was there a difference between subtypes? 2.) Did it change during development? 3.) Do the subtypes mature differently during development? Statistical results addressing these questions are listed sequentially in Supplementary Table 1: 1: Main effect of subtype; 2: main effect of development; 3: Subtype x development interaction. Holm-Sidak post hoc analysis was performed when significant main effects or interactions were detected with a significance level of  $p < 0.05$  and are summarized in Supplementary Table 1. Given that these data are continuous and parametric, we performed Pearson correlations  $w$  between rheobase current and passive properties (Gustafson and Pinter, 1984), within each motoneuron subtype at each week. A simple linear regression, comparing the slopes of delayed and immediate motoneurons, was used to determine the degree of similarities, or differences for each of the analyses performed (Figure 3). Two factor repeated measures ANOVA were conducted to test the effect of pharmacological agents on intrinsic properties and currents with MN type and drug as factors. Appropriate and equivalent nonparametric tests (Mann-Whitney or Kruskal-Wallis) were conducted when data failed tests of normality or equal variance with Shapiro Wilk and Brown-Forsythe tests, respectively. Individual data points for all cells are presented in figures with mean  $\pm$  SD. Statistical analyses were performed using Graph Pad Version 9.0 (Prism, San Diego, CA, USA).

Principal component analysis was performed using GraphPad Version 9.0 to determine global changes in motoneuron intrinsic properties during the first three weeks of postnatal development. 25 intrinsic properties from 261 motoneurons across weeks 1, 2, and 3 were included in the analysis. Principal component scores (PC Scores) for each cell were extracted for each Principal component and changes between subtypes during development were analyzed using a 2 factor ANOVA. 3D scatterplots between PC scores (PCs 1-3) were generated in Sigmaplot 14.0 (Sigmastat, San Jose, CA, USA).



## References

- Allodi I, Montañana-Rosell R, Selvan R, Löw P, Kiehn O. 2021. Locomotor deficits in a mouse model of ALS are paralleled by loss of V1-interneuron connections onto fast motor neurons. *Nat Commun* **12**:3251.
- Altman J, Sudarshan K. 1975. Postnatal development of locomotion in the laboratory rat. *Anim Behav* **23**:896–920.
- Ampatzis K, Song J, Ausborn J, El Manira A. 2013. Pattern of innervation and recruitment of different classes of motoneurons in adult zebrafish. *J Neurosci* **33**:10875–10886.
- Anelli R, Sanelli L, Bennett DJ, Heckman CJ. 2007. Expression of L-type calcium channel alpha(1)-1.2 and alpha(1)-1.3 subunits on rat sacral motoneurons following chronic spinal cord injury. *Neuroscience* **145**:751–763.
- Araki T, Ito M, Oshima T. 1961. Potential changes produced by application of current steps in motoneurons. *Nature* **191**:1104–1105.
- Azevedo AW, Dickinson ES, Gurung P, Venkatasubramanian L, Mann RS, Tuthill JC. 2020. A size principle for recruitment of leg motor neurons. *Elife* **9**. doi:10.7554/eLife.56754
- Bawa P, Binder MD, Ruenzel P, Henneman E. 1984. Recruitment order of motoneurons in stretch reflexes is highly correlated with their axonal conduction velocity. *J Neurophysiol* **52**:410–420.
- Bayliss DA, Viana F, Bellingham MC, Berger AJ. 1994. Characteristics and postnatal development of a hyperpolarization-activated inward current in rat hypoglossal motoneurons in vitro. *J Neurophysiol* **71**:119–128.
- Bennett DJ, Hultborn H, Fedirchuk B, Gorassini M. 1998. Short-term plasticity in hindlimb motoneurons of decerebrate cats. *J Neurophysiol* **80**:2038–2045.
- Bennett MR, McGrath PA, Davey DF, Hutchinson I. 1983. Death of motoneurons during the postnatal loss of polyneuronal innervation of rat muscles. *J Comp Neurol* **218**:351–363.
- Bertuzzi M, Ampatzis K. 2018. Spinal cholinergic interneurons differentially control motoneuron excitability and alter the locomotor network operational range. *Sci Rep* **8**:1988.
- Bhumbra GS, Beato M. 2018. Recurrent excitation between motoneurons propagates across segments and is purely glutamatergic. *PLoS Biol* **16**:e2003586.
- Binder MD, Heckman CJ, Powers RK. 2002. Relative strengths and distributions of different sources of synaptic input to the motoneuron pool: implications for motor unit recruitment. *Adv Exp Med Biol* **508**:207–212.
- Bos R, Harris-Warrick RM, Brocard C, Demianenko LE, Manuel M, Zytnicki D, Korogod SM, Brocard F. 2018. Kv1.2 Channels Promote Nonlinear Spiking Motoneurons for Powering Up Locomotion. *Cell Rep* **22**:3315–3327.
- Bouhadfane M, Tazerart S, Moqrish A, Vinay L, Brocard F. 2013. Sodium-mediated plateau potentials in lumbar motoneurons of neonatal rats. *J Neurosci* **33**:15626–15641.
- Bregman BS. 1987. Development of serotonin immunoreactivity in the rat spinal cord and its plasticity after neonatal spinal cord lesions. *Brain Res* **431**:245–263.
- Brocard C, Plantier V, Boulenguez P, Liabeuf S, Bouhadfane M, Viallat-Lieutaud A, Vinay L, Brocard F. 2016. Cleavage of Na(+) channels by calpain increases persistent Na(+) current and promotes spasticity after spinal cord injury. *Nat Med* **22**:404–411.
- Brocard F. 2019. New channel lineup in spinal circuits governing locomotion. *Current Opinion in Physiology*. doi:10.1016/j.cophys.2018.11.009
- Brocard F, Vinay L, Clarac F. 1999. Development of hindlimb postural control during the first postnatal week in the rat. *Brain Res Dev Brain Res* **117**:81–89.
- Brown MC, Jansen JK, Van Essen D. 1976. Polyneuronal innervation of skeletal muscle in new-born rats and its elimination during maturation. *J Physiol* **261**:387–422.
- Burke RE, Dum RP, Fleshman JW, Glenn LL, Lev-Tov A, O'Donovan MJ, Pinter MJ. 1982. A HRP study of the relation between cell size and motor unit type in cat ankle extensor motoneurons. *J Comp Neurol* **209**:17–28.
- Burke RE, Levine DN, Tsairis P, Zajac FE 3rd. 1973. Physiological types and histochemical profiles in motor units of the cat gastrocnemius. *J Physiol* **234**:723–748.
- Burke RE, ten Bruggencate G. 1971. Electrotonic characteristics of alpha motoneurons of varying size. *The Journal of Physiology*. doi:10.1113/jphysiol.1971.sp009307

## Postnatal development of motoneuron activation properties

- Buskila Y, Kékesi O, Bellot-Saez A, Seah W, Berg T, Trpceski M, Yerbury JJ, Ooi L. 2019. Dynamic interplay between H-current and M-current controls motoneuron hyperexcitability in amyotrophic lateral sclerosis. *Cell Death Dis* **10**:310.
- Carlin KP, Bui TV, Dai Y, Brownstone RM. 2009. Staircase currents in motoneurons: insight into the spatial arrangement of calcium channels in the dendritic tree. *J Neurosci* **29**:5343–5353.
- Carlin KP, Jones KE, Jiang Z, Jordan LM, Brownstone RM. 2000. Dendritic L-type calcium currents in mouse spinal motoneurons: implications for bistability. *Eur J Neurosci* **12**:1635–1646.
- Carrascal L, Nieto-Gonzalez JL, Cameron WE, Torres B, Nunez-Abades PA. 2005. Changes during the postnatal development in physiological and anatomical characteristics of rat motoneurons studied in vitro. *Brain Res Brain Res Rev* **49**:377–387.
- Carrascal L, Nieto-González JL, Torres B, Nunez-Abades P. 2011. Diminution of voltage threshold plays a key role in determining recruitment of oculomotor nucleus motoneurons during postnatal development. *PLoS One* **6**:e28748.
- Chang Q, Gonzalez M, Pinter MJ, Balice-Gordon RJ. 1999. Gap junctional coupling and patterns of connexin expression among neonatal rat lumbar spinal motor neurons. *J Neurosci* **19**:10813–10828.
- Chatelier A, Zhao J, Bois P, Chahine M. 2010. Biophysical characterisation of the persistent sodium current of the Nav1.6 neuronal sodium channel: a single-channel analysis. *Pflugers Arch* **460**:77–86.
- Close R. 1964. DYNAMIC PROPERTIES OF FAST AND SLOW SKELETAL MUSCLES OF THE RAT DURING DEVELOPMENT. *J Physiol* **173**:74–95.
- Commissiong JW. 1983. The development of catecholaminergic nerves in the spinal cord of rat. II. Regional development. *Brain Res* **313**:75–92.
- Conway BA, Hultborn H, Kiehn O, Mintz I. 1988. Plateau potentials in alpha-motoneurons induced by intravenous injection of L-dopa and clonidine in the spinal cat. *J Physiol* **405**:369–384.
- Cope TC, Clark BD. 1991. Motor-unit recruitment in the decerebrate cat: several unit properties are equally good predictors of order. *J Neurophysiol* **66**:1127–1138.
- Cope TC, Pinter MJ. 1995. The Size Principle: Still Working After All These Years. *Physiology*. doi:10.1152/physiologyonline.1995.10.6.280
- Cotel F, Antri M, Barthe J-Y, Orsal D. 2009. Identified ankle extensor and flexor motoneurons display different firing profiles in the neonatal rat. *J Neurosci* **29**:2748–2753.
- Deardorff AS, Romer SH, Fyffe REW. 2021. Location, location, location: the organization and roles of potassium channels in mammalian motoneurons. *J Physiol* **599**:1391–1420.
- Delestrée N, Manuel M, Iglesias C, Elbasiouny SM, Heckman CJ, Zytnicki D. 2014. Adult spinal motoneurons are not hyperexcitable in a mouse model of inherited amyotrophic lateral sclerosis. *J Physiol* **592**:1687–1703.
- Dengler R, Konstanzer A, Küther G, Hesse S, Wolf W, Struppler A. 1990. Amyotrophic lateral sclerosis: macro-EMG and twitch forces of single motor units. *Muscle Nerve* **13**:545–550.
- Dougherty KJ, Kiehn O. 2010. Firing and cellular properties of V2a interneurons in the rodent spinal cord. *J Neurosci* **30**:24–37.
- Durand J, Filipchuk A, Pambo-Pambo A, Amendola J, Borisovna Kulagina I, Guéritaud J-P. 2015. Developing electrical properties of postnatal mouse lumbar motoneurons. *Front Cell Neurosci* **9**:349.
- ElBasiouny SM, Bennett DJ, Mushahwar VK. 2005. Simulation of Dendritic CaV1.3 Channels in Cat Lumbar Motoneurons: Spatial Distribution. *Journal of Neurophysiology*. doi:10.1152/jn.00391.2005
- Engbers JDT, Anderson D, Tadayonnejad R, Mehaffey WH, Molineux ML, Turner RW. 2011. Distinct roles for I(T) and I(H) in controlling the frequency and timing of rebound spike responses. *J Physiol* **589**:5391–5413.
- Enjin A, Rabe N, Nakanishi ST, Vallstedt A, Gezelius H, Memic F, Lind M, Hjalt T, Tourtellotte WG, Bruder C, Eichele G, Whelan PJ, Kullander K. 2010. Identification of novel spinal cholinergic genetic subtypes disclose Chodl and Pitx2 as markers for fast motor neurons and partition cells. *J Comp Neurol* **518**:2284–2304.
- Fleshman JW, Munson JB, Sybert GW, Friedman WA. 1981. Rheobase, input resistance, and motor-unit type in medial gastrocnemius motoneurons in the cat. *J Neurophysiol* **46**:1326–1338.

## Postnatal development of motoneuron activation properties

- Fuchs A, Kutterer S, Mühlhling T, Duda J, Schütz B, Liss B, Keller BU, Roeper J. 2013. Selective mitochondrial Ca<sup>2+</sup> uptake deficit in disease endstage vulnerable motoneurons of the SOD1G93A mouse model of amyotrophic lateral sclerosis. *The Journal of Physiology*. doi:10.1113/jphysiol.2012.247981
- Gabriel JP, Ausborn J, Ampatzis K, Mahmood R, Eklöf-Ljunggren E, El Manira A. 2011. Principles governing recruitment of motoneurons during swimming in zebrafish. *Nature Neuroscience*. doi:10.1038/nn.2704
- Gardiner PF. 1993. Physiological properties of motoneurons innervating different muscle unit types in rat gastrocnemius. *J Neurophysiol* **69**:1160–1170.
- Gustafsson B, Pinter MJ. 1984. Relations among passive electrical properties of lumbar alpha-motoneurons of the cat. *J Physiol* **356**:401–431.
- Hanson MG, Gartz Hanson M, Landmesser LT. 2004. Normal Patterns of Spontaneous Activity Are Required for Correct Motor Axon Guidance and the Expression of Specific Guidance Molecules. *Neuron*. doi:10.1016/j.neuron.2004.08.018
- Harvey PJ, Li X, Li Y, Bennett DJ. 2006a. 5-HT<sub>2</sub> receptor activation facilitates a persistent sodium current and repetitive firing in spinal motoneurons of rats with and without chronic spinal cord injury. *J Neurophysiol* **96**:1158–1170.
- Harvey PJ, Li X, Li Y, Bennett DJ. 2006b. Endogenous Monoamine Receptor Activation Is Essential for Enabling Persistent Sodium Currents and Repetitive Firing in Rat Spinal Motoneurons. *Journal of Neurophysiology*. doi:10.1152/jn.00341.2006
- Harvey PJ, Li Y, Li X, Bennett DJ. 2006c. Persistent sodium currents and repetitive firing in motoneurons of the sacrocaudal spinal cord of adult rats. *J Neurophysiol* **96**:1141–1157.
- Heckman CJ, Hyngstrom AS, Johnson MD. 2008a. Active properties of motoneurone dendrites: diffuse descending neuromodulation, focused local inhibition. *J Physiol* **586**:1225–1231.
- Heckman CJ, Johnson M, Mottram C, Schuster J. 2008b. Persistent inward currents in spinal motoneurons and their influence on human motoneuron firing patterns. *Neuroscientist* **14**:264–275.
- Henneman E. 1957. Relation between size of neurons and their susceptibility to discharge. *Science* **126**:1345–1347.
- Houngaard J, Hultborn H, Jespersen B, Kiehn O. 1988. Bistability of alpha-motoneurons in the decerebrate cat and in the acute spinal cat after intravenous 5-hydroxytryptophan. *The Journal of Physiology*. doi:10.1113/jphysiol.1988.sp017336
- Houngaard J, Kiehn O. 1993. Calcium spikes and calcium plateaux evoked by differential polarization in dendrites of turtle motoneurons in vitro. *J Physiol* **468**:245–259.
- Houngaard J, Kiehn O. 1989. Serotonin-induced bistability of turtle motoneurons caused by a nifedipine-sensitive calcium plateau potential. *J Physiol* **414**:265–282.
- Houngaard J, Kiehn O. 1985. Ca<sup>++</sup> dependent bistability induced by serotonin in spinal motoneurons. *Exp Brain Res* **57**:422–425.
- Huh S, Heckman CJ, Manuel M. 2021. Time Course of Alterations in Adult Spinal Motoneuron Properties in the SOD1(G93A) Mouse Model of ALS. *eNeuro* **8**. doi:10.1523/ENEURO.0378-20.2021
- Hu X, Suresh AK, Rymer WZ, Suresh NL. 2015. Assessing altered motor unit recruitment patterns in paretic muscles of stroke survivors using surface electromyography. *J Neural Eng* **12**:066001.
- Iglesias C, Meunier C, Manuel M, Timofeeva Y, Delestree N, Zytnicki D. 2011. Mixed Mode Oscillations in Mouse Spinal Motoneurons Arise from a Low Excitability State. *Journal of Neuroscience*. doi:10.1523/jneurosci.6363-10.2011
- Ito M, Oshima T. 1965. Electrical behaviour of the motoneurone membrane during intracellularly applied current steps. *J Physiol* **180**:607–635.
- Jensen DB, Stecina K, Wienecke J, Hedegaard A, Sukiasyan N, Hultborn HR, Meehan CF. 2018. The Subprimary Range of Firing Is Present in Both Cat and Mouse Spinal Motoneurons and Its Relationship to Force Development Is Similar for the Two Species. *J Neurosci* **38**:9741–9753.
- Jha U, Thirumalai V. n.d. Neuromodulatory selection of motor neuron recruitment patterns in a visuomotor behavior increases speed. doi:10.1101/683649
- Jørgensen HS, Jensen DB, Dimintyanova KP, Bonnevie VS, Hedegaard A, Lehnhoff J, Moldovan M, Grondahl L, Meehan CF. 2020. Increased Axon Initial Segment Length Results in Increased Na

## Postnatal development of motoneuron activation properties

- Currents in Spinal Motoneurons at Symptom Onset in the G127X SOD1 Mouse Model of Amyotrophic Lateral Sclerosis. *Neuroscience*. doi:10.1016/j.neuroscience.2020.11.016
- Kaplan A, Spiller KJ, Towne C, Kanning KC, Choe GT, Geber A, Akay T, Aebischer P, Henderson CE. 2014. Neuronal matrix metalloproteinase-9 is a determinant of selective neurodegeneration. *Neuron* **81**:333–348.
- Kernell D, Hultborn H. 1990. Synaptic effects on recruitment gain: a mechanism of importance for the input-output relations of motoneurone pools? *Brain Res* **507**:176–179.
- Kernell D, Zwaagstra B. 1981. Input conductance axonal conduction velocity and cell size among hindlimb motoneurons of the cat. *Brain Res* **204**:311–326.
- Kiehn O, Kjaerulff O, Tresch MC, Harris-Warrick RM. 2000. Contributions of intrinsic motor neuron properties to the production of rhythmic motor output in the mammalian spinal cord. *Brain Res Bull* **53**:649–659.
- Kjaerulff O, Kiehn O. 2001. 5-HT modulation of multiple inward rectifiers in motoneurons in intact preparations of the neonatal rat spinal cord. *J Neurophysiol* **85**:580–593.
- Krzemien DM, Schaller KL, Levinson SR, Caldwell JH. 2000. Immunolocalization of sodium channel isoform NaCh6 in the nervous system. *J Comp Neurol* **420**:70–83.
- Kuo JJ, Lee RH, Zhang L, Heckman CJ. 2006. Essential role of the persistent sodium current in spike initiation during slowly rising inputs in mouse spinal neurones. *J Physiol* **574**:819–834.
- Lee RH, Heckman CJ. 1998a. Bistability in Spinal Motoneurons In Vivo: Systematic Variations in Persistent Inward Currents. *Journal of Neurophysiology*. doi:10.1152/jn.1998.80.2.583
- Lee RH, Heckman CJ. 1998b. Bistability in Spinal Motoneurons In Vivo: Systematic Variations in Rhythmic Firing Patterns. *Journal of Neurophysiology*. doi:10.1152/jn.1998.80.2.572
- Leroy F, Lamotte d'Incamps B, Imhoff-Manuel RD, Zytnicki D. 2014. Early intrinsic hyperexcitability does not contribute to motoneuron degeneration in amyotrophic lateral sclerosis. *Elife* **3**. doi:10.7554/eLife.04046
- Leroy F, Lamotte d'Incamps B, Zytnicki D. 2015. Potassium currents dynamically set the recruitment and firing properties of F-type motoneurons in neonatal mice. *J Neurophysiol* **114**:1963–1973.
- Liddell EGT, Sherrington SCS. 1924\*. Further Observations on Myotatic Reflexes.
- Li X, Murray K, Harvey PJ, Ballou EW, Bennett DJ. 2007. Serotonin facilitates a persistent calcium current in motoneurons of rats with and without chronic spinal cord injury. *J Neurophysiol* **97**:1236–1246.
- Li Y, Bennett DJ. 2003. Persistent Sodium and Calcium Currents Cause Plateau Potentials in Motoneurons of Chronic Spinal Rats. *Journal of Neurophysiology*. doi:10.1152/jn.00236.2003
- Li Y, Brewer D, Burke RE, Ascoli GA. 2005. Developmental changes in spinal motoneuron dendrites in neonatal mice. *The Journal of Comparative Neurology*. doi:10.1002/cne.20438
- Li Y, Gorassini MA, Bennett DJ. 2004. Role of persistent sodium and calcium currents in motoneuron firing and spasticity in chronic spinal rats. *J Neurophysiol* **91**:767–783.
- MacLean JN, Zhang Y, Johnson BR, Harris-Warrick RM. 2003. Activity-independent homeostasis in rhythmically active neurons. *Neuron*.
- Manuel M, Iglesias C, Donnet M, Leroy F, Heckman CJ, Zytnicki D. 2009. Fast kinetics, high-frequency oscillations, and subprimary firing range in adult mouse spinal motoneurons. *J Neurosci* **29**:11246–11256.
- Martínez-Silva M de L, Imhoff-Manuel RD, Sharma A, Heckman CJ, Shneider NA, Roselli F, Zytnicki D, Manuel M. 2018. Hypoexcitability precedes denervation in the large fast-contracting motor units in two unrelated mouse models of ALS. *Elife* **7**. doi:10.7554/eLife.30955
- McLarnon JG. 1995. Potassium currents in motoneurons. *Prog Neurobiol* **47**:513–531.
- McLean DL, Fan J, Higashijima S-I, Hale ME, Fetcho JR. 2007. A topographic map of recruitment in spinal cord. *Nature* **446**:71–75.
- Meehan CF, Sukiasyan N, Zhang M, Nielsen JB, Hultborn H. 2010. Intrinsic properties of mouse lumbar motoneurons revealed by intracellular recording in vivo. *J Neurophysiol* **103**:2599–2610.
- Miles GB, Dai Y, Brownstone RM. 2005. Mechanisms underlying the early phase of spike frequency adaptation in mouse spinal motoneurons. *J Physiol* **566**:519–532.
- Miles GB, Hartley R, Todd AJ, Brownstone RM. 2007. Spinal cholinergic interneurons regulate the excitability of motoneurons during locomotion. *Proc Natl Acad Sci U S A* **104**:2448–2453.
- Milligan CJ, Edwards IJ, Deuchars J. 2006. HCN1 ion channel immunoreactivity in spinal cord and

## Postnatal development of motoneuron activation properties

- medulla oblongata. *Brain Res* **1081**:79–91.
- Nakanishi ST, Whelan PJ. 2010. Diversification of intrinsic motoneuron electrical properties during normal development and botulinum toxin-induced muscle paralysis in early postnatal mice. *J Neurophysiol* **103**:2833–2845.
- Nascimento F, Broadhead MJ, Tetranga E, Tsape E, Zagoraiou L, Miles GB. 2020. Synaptic mechanisms underlying modulation of locomotor-related motoneuron output by premotor cholinergic interneurons. *Elife* **9**. doi:10.7554/eLife.54170
- Nascimento F, Spindler LRB, Miles GB. 2019. Balanced cholinergic modulation of spinal locomotor circuits via M2 and M3 muscarinic receptors. *Sci Rep* **9**:14051.
- Nielsen JB, Morita H, Wenzelburger R, Deuschl G, Gossard J-P, Hultborn H. 2019. Recruitment gain of spinal motor neuron pools in cat and human. *Exp Brain Res* **237**:2897–2909.
- Nijssen J, Comley LH, Hedlund E. 2017. Motor neuron vulnerability and resistance in amyotrophic lateral sclerosis. *Acta Neuropathol* **133**:863–885.
- Perrier J-F, Alaburda A, Hounsgaard J. 2003. 5-HT<sub>1A</sub> receptors increase excitability of spinal motoneurons by inhibiting a TASK-1-like K<sup>+</sup> current in the adult turtle. *J Physiol* **548**:485–492.
- Perrier JF, Hounsgaard J. 1999. Ca<sup>2+</sup>-activated nonselective cationic current (I(CAN)) in turtle motoneurons. *J Neurophysiol* **82**:730–735.
- Personius KE, Chang Q, Mentis GZ, O'Donovan MJ, Balice-Gordon RJ. 2007. Reduced gap junctional coupling leads to uncorrelated motor neuron firing and precocious neuromuscular synapse elimination. *Proc Natl Acad Sci U S A* **104**:11808–11813.
- Pflieger J-F, Clarac F, Vinay L. 2002. Postural modifications and neuronal excitability changes induced by a short-term serotonin depletion during neonatal development in the rat. *J Neurosci* **22**:5108–5117.
- Picton LD, Sillar KT, Zhang H-Y. 2018. Control of Xenopus Tadpole Locomotion via Selective Expression of Ih in Excitatory Interneurons. *Curr Biol* **28**:3911–3923.e2.
- Quinlan KA, Schuster JE, Fu R, Siddique T, Heckman CJ. 2011. Altered postnatal maturation of electrical properties in spinal motoneurons in a mouse model of amyotrophic lateral sclerosis. *J Physiol* **589**:2245–2260.
- Revoll AL, Chu NY, Ma L, LeBlancq MJ, Dickson CT, Funk GD. 2019. Postnatal development of persistent inward currents in rat XII motoneurons and their modulation by serotonin, muscarine and noradrenaline. *J Physiol* **597**:3183–3201.
- Rotterman TM, Carrasco D, Housley N, Nardelli P, Powers RK, Cope TC. n.d. Somatic Proximity of the Axon Initial Segment Predicts Motoneuron Excitability. doi:10.21203/rs.3.rs-318156/v1
- Russier M, Carlier E, Ankri N, Fronzaroli L, Debanne D. 2003. A-, T-, and H-type currents shape intrinsic firing of developing rat abducens motoneurons. *J Physiol* **549**:21–36.
- Schaller KL, Caldwell JH. 2000. Developmental and regional expression of sodium channel isoform NaCh6 in the rat central nervous system. *J Comp Neurol* **420**:84–97.
- Schwandt PC, Crill WE. 1980. Properties of a persistent inward current in normal and TEA-injected motoneurons. *J Neurophysiol* **43**:1700–1724.
- Schwandt P, Crill WE. 1977. A persistent negative resistance in cat lumbar motoneurons. *Brain Res* **120**:173–178.
- Sirois JE, Lynch C 3rd, Bayliss DA. 2002. Convergent and reciprocal modulation of a leak K<sup>+</sup> current and I(h) by an inhalational anaesthetic and neurotransmitters in rat brainstem motoneurons. *J Physiol* **541**:717–729.
- Smith CC, Brownstone RM. 2020. Spinal motoneuron firing properties mature from rostral to caudal during postnatal development of the mouse. *J Physiol* **598**:5467–5485.
- Somjen G, Carpenter DO, Henneman E. 1965. Responses of motoneurons of different sizes to graded stimulation of supraspinal centers of the brain. *J Neurophysiol* **28**:958–965.
- Song J, Pallucchi I, Ausborn J, Ampatzis K, Bertuzzi M, Fontanel P, Picton LD, El Manira A. 2020. Multiple Rhythm-Generating Circuits Act in Tandem with Pacemaker Properties to Control the Start and Speed of Locomotion. *Neuron* **105**:1048–1061.e4.
- Soulard C, Salsac C, Mouzat K, Hilaire C, Roussel J, Mezghrani A, Lombroso S, Raoul C, Scamps F. 2020. Spinal Motoneuron TMEM16F Acts at C-boutons to Modulate Motor Resistance and Contributes to ALS Pathogenesis. *Cell Rep* **30**:2581–2593.e7.
- Steele PR, Cavarsan CF, Dowaliby L, Westefeld M, Katenka N, Drobyshevsky A, Gorassini MA,

## Postnatal development of motoneuron activation properties

- Quinlan KA. 2020. Altered Motoneuron Properties Contribute to Motor Deficits in a Rabbit Hypoxia-Ischemia Model of Cerebral Palsy. *Front Cell Neurosci* **14**:69.
- Takahashi T. 1990. Inward rectification in neonatal rat spinal motoneurons. *J Physiol* **423**:47–62.
- Taylor AL. 2012. What we talk about when we talk about capacitance measured with the voltage-clamp step method. *J Comput Neurosci* **32**:167–175.
- Thomas CK, Bakels R, Klein CS, Zijdwind I. 2014. Human spinal cord injury: motor unit properties and behaviour. *Acta Physiol* **210**:5–19.
- Tsuzuki S, Yoshida S, Yamamoto T, Oka H. 1995. Developmental changes in the electrophysiological properties of neonatal rat oculomotor neurons studied in vitro. *Neurosci Res* **23**:389–397.
- Vecchio AD, Del Vecchio A, Sylos-Labini F, Mondì V, Paolillo P, Ivanenko Y, Lacquaniti F, Farina D. 2020. Spinal motoneurons of the human newborn are highly synchronized during leg movements. *Science Advances*. doi:10.1126/sciadv.abc3916
- Verneuil J, Brocard C, Trouplin V, Villard L, Peyronnet-Roux J, Brocard F. 2020. The M-current works in tandem with the persistent sodium current to set the speed of locomotion. *PLOS Biology*. doi:10.1371/journal.pbio.3000738
- Vinay L, Ben-Mabrouk F, Brocard F, Clarac F, Jean-Xavier C, Pearlstein E, Pflieger J-F. 2005. Perinatal development of the motor systems involved in postural control. *Neural Plast* **12**:131–9; discussion 263–72.
- Vinay L, Brocard F, Clarac F. 2000a. Differential maturation of motoneurons innervating ankle flexor and extensor muscles in the neonatal rat. *European Journal of Neuroscience*. doi:10.1046/j.0953-816x.2000.01321.x
- Vinay L, Brocard F, Clarac F, Norreel JC, Pearlstein E, Pflieger JF. 2002. Development of posture and locomotion: an interplay of endogenously generated activities and neurotrophic actions by descending pathways. *Brain Res Brain Res Rev* **40**:118–129.
- Vinay L, Brocard F, Pflieger JF, Simeoni-Alias J, Clarac F. 2000b. Perinatal development of lumbar motoneurons and their inputs in the rat. *Brain Res Bull* **53**:635–647.
- Walton KD, Navarrete R. 1991. Postnatal changes in motoneurone electrotonic coupling studied in the in vitro rat lumbar spinal cord. *J Physiol* **433**:283–305.
- Wilson JM, Hartley R, Maxwell DJ, Todd AJ, Lieberam I, Kaltschmidt JA, Yoshida Y, Jessell TM, Brownstone RM. 2005. Conditional rhythmicity of ventral spinal interneurons defined by expression of the Hb9 homeodomain protein. *J Neurosci* **25**:5710–5719.
- Zajac FE, Faden JS. 1985. Relationship among recruitment order, axonal conduction velocity, and muscle-unit properties of type-identified motor units in cat plantaris muscle. *J Neurophysiol* **53**:1303–1322.
- Zengel JE, Reid SA, Sybert GW, Munson JB. 1985. Membrane electrical properties and prediction of motor-unit type of medial gastrocnemius motoneurons in the cat. *J Neurophysiol* **53**:1323–1344.
- Zhang M, Sukiasyan N, Møller M, Bezprozvanny I, Zhang H, Wienecke J, Hultborn H. 2006. Localization of L-type calcium channel Ca(V)1.3 in cat lumbar spinal cord--with emphasis on motoneurons. *Neurosci Lett* **407**:42–47.
- Zhang Q, Dai Y. 2020. A modeling study of spinal motoneuron recruitment regulated by ionic channels during fictive locomotion. *Journal of Computational Neuroscience*. doi:10.1007/s10827-020-00763-4
- Zhong G, Droho S, Crone SA, Dietz S, Kwan AC, Webb WW, Sharma K, Harris-Warrick RM. 2010. Electrophysiological characterization of V2a interneurons and their locomotor-related activity in the neonatal mouse spinal cord. *J Neurosci* **30**:170–182.
- Zwart MF, Pulver SR, Truman JW, Fushiki A, Fetter RD, Cardona A, Landgraf M. 2016. Selective Inhibition Mediates the Sequential Recruitment of Motor Pools. *Neuron* **91**:944.

Postnatal development of motoneuron activation properties

Supplementary Figures and Tables

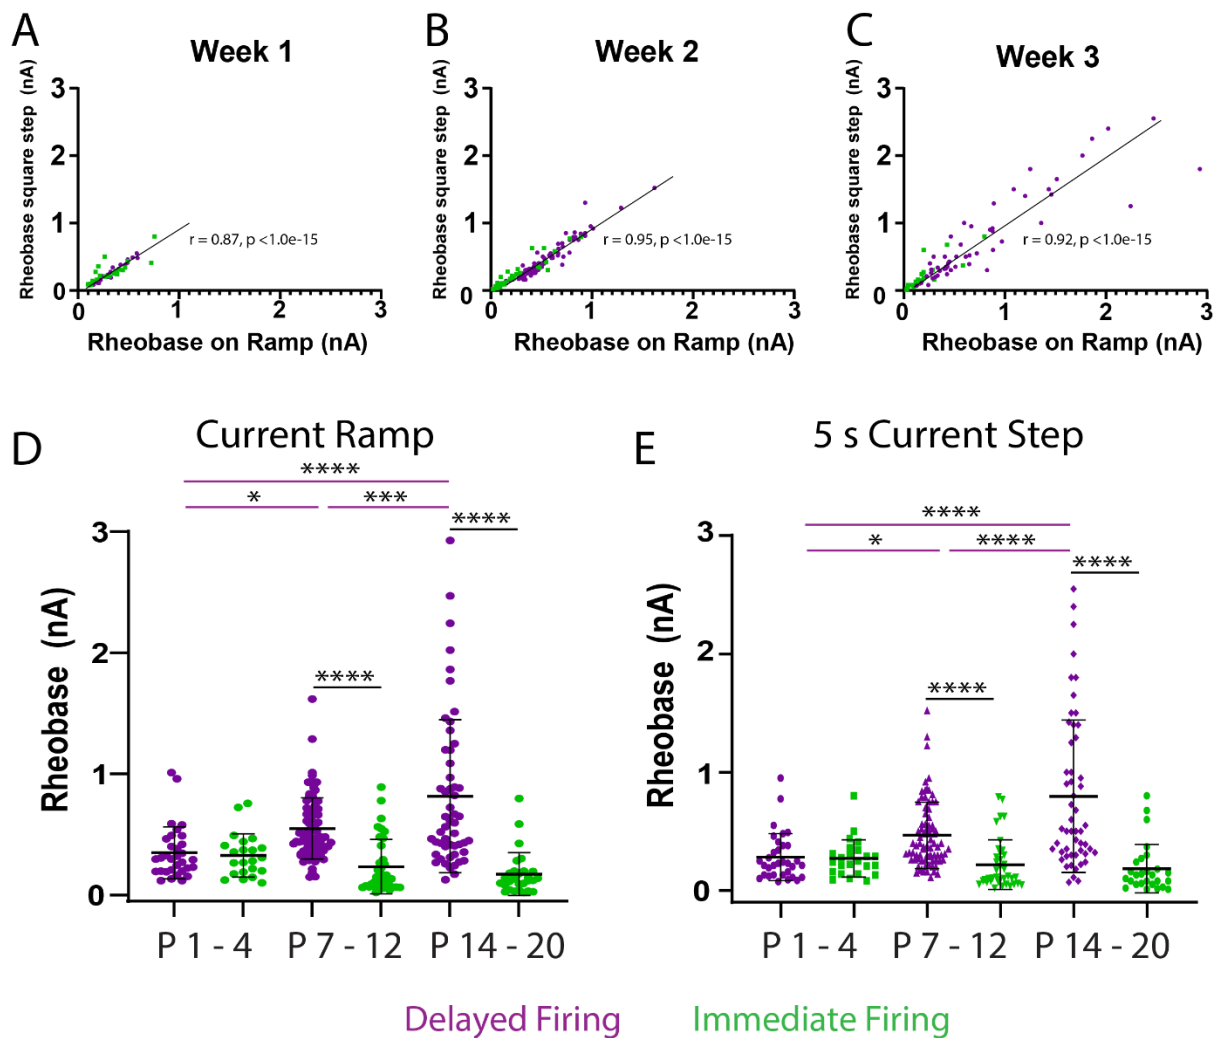

**Supplementary Figure 1: Rheobase is correlated and shows similar changes during postnatal development when measured during depolarizing current ramps or square depolarizing current steps.** A-C) Scatter plots for rheobase measured during depolarizing current ramps (x-axis) and square depolarizing current steps (y-axis) in delayed (purple) and immediate (green) firing motoneurons during the first (A), second (B), and third (C) postnatal weeks. Data were analyzed with a Pearson Correlation. D-E) Rheobase increases in delayed but not immediate firing motoneurons across postnatal development when measured using depolarizing current ramps (D) or depolarizing current steps (E). Statistical analyses were conducted with one or 2-way ANOVA and Holm-Sidak post hoc analysis when significant effects were detected. Asterisks denote significant differences from Holm-Sidak post hoc analysis \*  $p < 0.05$ , \*\*  $p < 0.01$ , \*\*\*  $p < 0.001$ , \*\*\*\*  $p < 0.0001$ . Data are presented as individual points for each motoneuron studied with black bars depicting mean  $\pm$  SD.

## Postnatal development of motoneuron activation properties

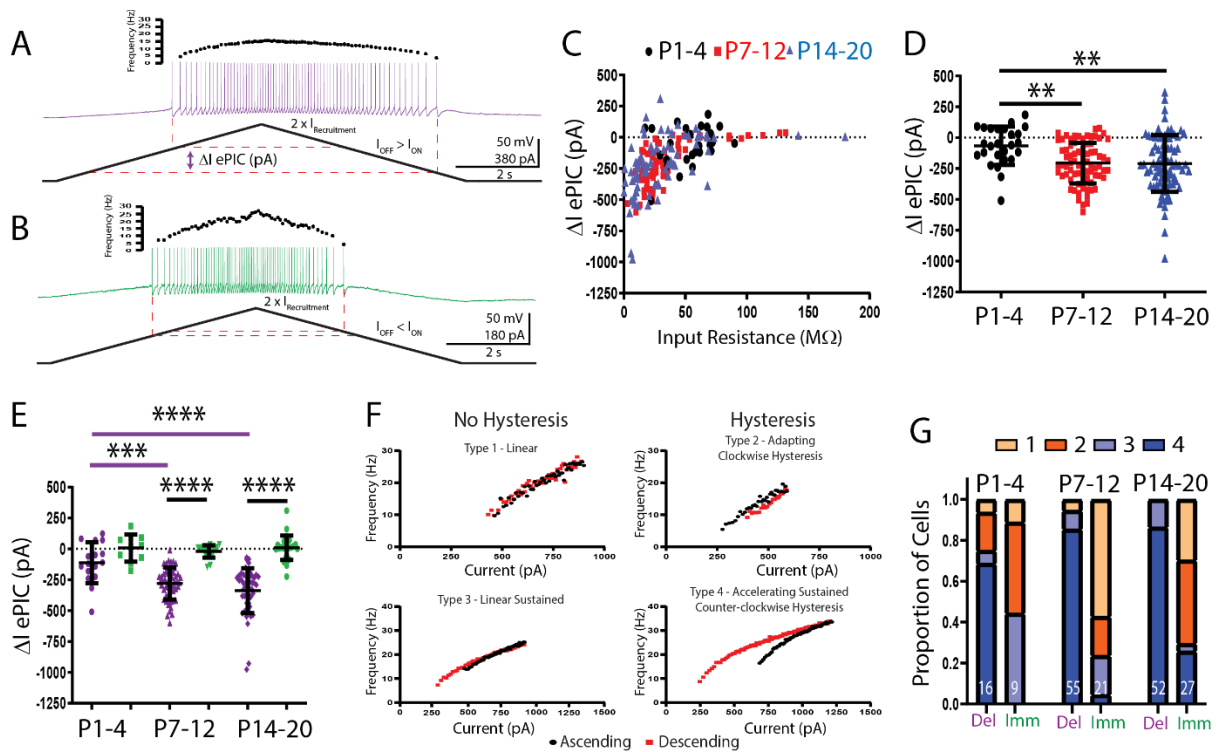

**Supplementary Figure 2: Maturation of recruitment-derecruitment and firing hysteresis during postnatal development.** Representative traces of the membrane potential and repetitive firing from a delayed (A: purple) and immediate firing (B: green) motoneuron during a triangular depolarizing current ramp up to an intensity of 2 x their respective recruitment currents. Recruitment-derecruitment hysteresis (ePIC), characterized by a lower current at derecruitment on the descending limb compared to recruitment on the ascending limb, producing a negative Delta I, is suggestive of the activation of a persistent inward current (PIC). Delta I is correlated with input resistance (C), increases after week 2 (D), but only in delayed firing motoneurons (E). Statistical analyses were conducted with one or 2-way ANOVA and Holm-Sidak post hoc analysis when significant effects were detected. Asterisks denote significant differences from Holm-Sidak post hoc analysis \*  $p < 0.05$ , \*\*  $p < 0.01$ , \*\*\*  $p < 0.001$ , \*\*\*\*  $p < 0.0001$ . F.) Four patterns of firing rate hysteresis can be identified as described by Li and Bennett, 2006, with types 3 and 4 suggestive of PIC action. G.) Relative proportion of firing hysteresis types in fast and slow motoneurons across three weeks of postnatal development.



**Supplementary Table 1: Passive, recruitment, repetitive firing, and single spike properties delayed and immediate firing motoneuron subtypes across three postnatal weeks.** Number of motoneurons (n) included in each subtype (Del: delayed; Imm: immediate) across postnatal weeks 1-3. Passive properties include whole cell capacitance, tau, input resistance, and resting membrane potential (RMP). Recruitment properties: rheobase, derecruitment current, current firing range, voltage threshold of the first spike, and relative distance between RMP and spike threshold. Repetitive firing properties measured following recruitment on slow depolarizing current ramps include minimum firing rate, firing rate at 2 x rheobase, maximum firing rate, and the slope of the sub primary range (SPR). Single spike (action potential) properties including spike amplitude, rise time, and half width were measured from threshold, and medium afterhyperpolarization (mAHP) amplitude and half width, were elicited with a 10 ms square current pulse applied at 1.25 x rheobase. Statistics: Data were analyzed using 2 Factor ANOVA with MN type (Del and Imm) and developmental week (Week 1, 2, 3) as factors. Statistical analyses addressed 3 core questions: 1.) Was there a difference between subtypes? 2.) Did it change during development? 3.) Do the subtypes mature differentially during development? Statistical results listing F and p values from 2 factor ANOVA addressing these questions are listed sequentially: 1: Main effect of subtype; 2: Main effect of development; 3: Subtype x development interaction. All data are presented as mean  $\pm$  SD (min, max). P values are derived from Holm-Sidak posthoc comparisons within weeks, between MN types. Superscript numbers denote significant differences from Holm-Sidak within MN types, between weeks (1: week 1; 2: week 2; 3: week 3).

| <b>Postnatal Maturation of Fast and Slow Motoneuron Intrinsic Properties (257 cells from 95 animals)</b> |         |                                                           |                                                             |                                                             |                                                |
|----------------------------------------------------------------------------------------------------------|---------|-----------------------------------------------------------|-------------------------------------------------------------|-------------------------------------------------------------|------------------------------------------------|
| <b>Parameter</b>                                                                                         |         | <b>Week 1 (P1-4)<sup>1</sup><br/>57 cells, 18 animals</b> | <b>Week 2 (P7-12)<sup>2</sup><br/>122 cells, 42 animals</b> | <b>Week 3 (P14-20)<sup>3</sup><br/>81 cells, 35 animals</b> | <b>2W<br/>ANOVA<br/>F, p</b>                   |
| Cells (n)                                                                                                | Del     | 33                                                        | 82                                                          | 53                                                          |                                                |
|                                                                                                          | Imm     | 24                                                        | 40                                                          | 28                                                          |                                                |
| <b>Passive Properties</b>                                                                                |         |                                                           |                                                             |                                                             |                                                |
| Capacitance (pF)                                                                                         | Del     | 285 $\pm$ 94(112,542) <sup>2,3</sup>                      | 494 $\pm$ 211(139,1191) <sup>1</sup>                        | 467 $\pm$ 271(63,1220) <sup>1</sup>                         | 32.1, 3.9e-8<br>9.9, 6.8e-5<br>3.6, 0.03       |
|                                                                                                          | Imm     | 243 $\pm$ 73(139,378)                                     | 312 $\pm$ 191(67,668)                                       | 258 $\pm$ 99(116,433)                                       |                                                |
|                                                                                                          | P value | 0.9                                                       | 3.6e-6                                                      | 6.5e-6                                                      |                                                |
| Tau (ms)                                                                                                 | Del     | 17.1 $\pm$ 7.4(4.2,37.6) <sup>3</sup>                     | 13.5 $\pm$ 5.0(3.4,27.7)                                    | 9.9 $\pm$ 5.7(2.1,34.4) <sup>1</sup>                        | 41.5, 5.9e-10<br>1.1, 0.3<br>7.9, 4.7e-4       |
|                                                                                                          | Imm     | 17.8 $\pm$ 7.9(6.8,35.7) <sup>2,3</sup>                   | 26.1 $\pm$ 19.0(6.1,75.0) <sup>1</sup>                      | 25.6 $\pm$ 19.6(3.7,82) <sup>1</sup>                        |                                                |
|                                                                                                          | P value | 0.97                                                      | 1.8e-7                                                      | 7.8e-8                                                      |                                                |
| Passive Input Resistance (M $\Omega$ )                                                                   | Del     | 65.1 $\pm$ 33.0(21.7,167.5) <sup>2,3</sup>                | 30.8 $\pm$ 15.9(10.4,114.1) <sup>1</sup>                    | 27.2 $\pm$ 18.6(6.6,93.4) <sup>1</sup>                      | 78.9, >1.0e-15<br>0.7, 0.5<br>10.6, 3.9e-5     |
|                                                                                                          | Imm     | 76.6 $\pm$ 35.5(30.4,114.1) <sup>3</sup>                  | 94.4 $\pm$ 62.5(22.3,290.5)                                 | 106.0 $\pm$ 88.2(18.1,400) <sup>1</sup>                     |                                                |
|                                                                                                          | P value | 0.6                                                       | 5.3x10e-12                                                  | 1.2e-12                                                     |                                                |
| Steady State Input Resistance (M $\Omega$ )                                                              | Del     | 49.4 $\pm$ 17.1(22.0,99.9) <sup>2,3</sup>                 | 27.2 $\pm$ 18.4(2.8,99.4) <sup>1</sup>                      | 17.7 $\pm$ 13.9(0.6,68) <sup>1</sup>                        | 52.9, 4.5e-12<br>3.7, 0.03<br>6.6, 0.002       |
|                                                                                                          | Imm     | 57.2 $\pm$ 18.4(17.2,90.0)                                | 73.5 $\pm$ 65.4(17.8,326.0)                                 | 59.9 $\pm$ 42.5(15.7,180)                                   |                                                |
|                                                                                                          | P value | 0.6                                                       | 1.4e-10                                                     | 6.1x10 <sup>-7</sup>                                        |                                                |
| Resting Membrane Potential (mV)                                                                          | Del     | -62.6 $\pm$ 4.0(-69.0,-50.0) <sup>3</sup>                 | -63.9 $\pm$ 4.2(-72.0,-52.0) <sup>3</sup>                   | -66.8 $\pm$ 3.6(-77,-60.0) <sup>1,2</sup>                   | 25.5, 8.4e-7<br>10.4, 4.4e-5<br>4.4, 0.01      |
|                                                                                                          | Imm     | -61.7 $\pm$ 4.4(-69.0,-50.0) <sup>2</sup>                 | -58.3 $\pm$ 5.4(-72.0,-52.0) <sup>1,3</sup>                 | -61.5 $\pm$ 6.9(-73.0,-51.0) <sup>2</sup>                   |                                                |
|                                                                                                          | P value | 0.8                                                       | 1.3e-8                                                      | 3.5e-5                                                      |                                                |
| <b>Recruitment Properties (Ramp)</b>                                                                     |         |                                                           |                                                             |                                                             |                                                |
| Rheobase (pA)                                                                                            | Del     | 349 $\pm$ 214(118,1010) <sup>2,3</sup>                    | 550 $\pm$ 254(149,1619) <sup>1,3</sup>                      | 816 $\pm$ 631(127,2929) <sup>1,2</sup>                      | 45.4, 1.1e-10<br>3.4, 0.04<br>12.1, 9.6e-6     |
|                                                                                                          | Imm     | 327 $\pm$ 178(101,757)                                    | 235 $\pm$ 225(23,891)                                       | 173 $\pm$ 176(23,797)                                       |                                                |
|                                                                                                          | P value | 0.8                                                       | 1.0e-4                                                      | 2.3e-12                                                     |                                                |
| Derecruitment Current (pA)                                                                               | Del     | 1038 $\pm$ 300(286,1501) <sup>2,3</sup>                   | 2372 $\pm$ 752(967,4605) <sup>1,3</sup>                     | 3624 $\pm$ 1374(1586,7828) <sup>1,2</sup>                   | 27.1, 4.0e-7<br>57.1, >1.0e-15<br>14.1, 1.7e-6 |
|                                                                                                          | Imm     | 1290 $\pm$ 344(413,1862) <sup>3</sup>                     | 1661 $\pm$ 659(394,25430)                                   | 2151 $\pm$ 999(726,4023) <sup>1</sup>                       |                                                |
|                                                                                                          | P value | 0.99                                                      | 0.001                                                       | 1.7e-10                                                     |                                                |
| Current Firing Range (pA)                                                                                | Del     | 937 $\pm$ 297(210,1490) <sup>2,3</sup>                    | 1810 $\pm$ 678(604,3776) <sup>1,3</sup>                     | 2853 $\pm$ 1029(1136,6236) <sup>1,2</sup>                   | 24.7, 1.1e-6<br>70.1, >1.0e-15<br>3.4, 0.03    |
|                                                                                                          | Imm     | 695 $\pm$ 251(154,1089) <sup>2,3</sup>                    | 1396 $\pm$ 571(311,2379) <sup>1,3</sup>                     | 1962 $\pm$ 965(699,3904) <sup>1,2</sup>                     |                                                |
|                                                                                                          | P value | 0.99                                                      | 0.08                                                        | 7.0e-6                                                      |                                                |
| First Spike TH (mV)                                                                                      | Del     | -37.9 $\pm$ 3.7(-44.8,-29.0) <sup>3</sup>                 | -38.8 $\pm$ 3.3(-45.2,-31.2) <sup>3</sup>                   | -43.7 $\pm$ 3.8(-51.8,-34.4) <sup>1,2</sup>                 | 7.4, 0.007<br>80.4, >1.0e-15<br>6.6, 0.002     |
|                                                                                                          | Imm     | -36.6 $\pm$ 3.1(-43.5,-30.2) <sup>2,3</sup>               | -41.3 $\pm$ 4.6(-51.2,-30.5) <sup>1,3</sup>                 | -47.2 $\pm$ 4.5(-54.1,-35.7) <sup>1,2</sup>                 |                                                |
|                                                                                                          | P value | 0.4                                                       | 0.02                                                        | 5.3e-4                                                      |                                                |
| Spike TH-RMP (mV)                                                                                        | Del     | 24.5 $\pm$ 5.4(11.3,22.9)                                 | 24.2 $\pm$ 4.8(10.2,23.8)                                   | 26.5 $\pm$ 5.3(17.6,25.9)                                   | 35.6, 8.5e-9<br>5.7, 0.004<br>9.7, 9.2e-5      |
|                                                                                                          | Imm     | 25.1 $\pm$ 5.6(12.3,19.8) <sup>2,3</sup>                  | 17.9 $\pm$ 7.0(3.8,30.3) <sup>1</sup>                       | 18.9 $\pm$ 7.1(6.3,30.5) <sup>1</sup>                       |                                                |
|                                                                                                          | P value | 0.9                                                       | 1.0e-8                                                      | 6.0e-7                                                      |                                                |
| <b>Repetitive Firing Properties on Ramp</b>                                                              |         |                                                           |                                                             |                                                             |                                                |
| Minimum Firing Rate (Hz)                                                                                 | Del     | 10.9 $\pm$ 3.7(6.9,24.0) <sup>3</sup>                     | 10.5 $\pm$ 5.2(4.9,43.8) <sup>3</sup>                       | 6.9 $\pm$ 2.2(4.5,15.2) <sup>1,2</sup>                      | 2.4, 0.1<br>15.1, 6.5e-7<br>6.7, 0.002         |
|                                                                                                          | Imm     | 11.3 $\pm$ 4.8(6.2,24.3) <sup>2,3</sup>                   | 7.1 $\pm$ 2.4(2.4,13.4) <sup>1</sup>                        | 7.4 $\pm$ 2.5(2.2,12.3)                                     |                                                |
|                                                                                                          | P value | 0.99                                                      | 0.01                                                        | 0.99                                                        |                                                |
| Firing Rate at 2x Rheobase (Hz)                                                                          | Del     | 24.7 $\pm$ 5.8(14.2,38.6)                                 | 28.9 $\pm$ 8.3(13.1,53.2) <sup>3</sup>                      | 24.5 $\pm$ 9.8(8.2,52.6) <sup>2</sup>                       | 33.7, 2.0e-8<br>1.9, 0.2                       |
|                                                                                                          | Imm     | 21.2 $\pm$ 5.3(13.3,38.5)                                 | 17.9 $\pm$ 9.6(3.4,45.3)                                    | 17.1 $\pm$ 12.8(5.4,61.4)                                   |                                                |

Postnatal development of motoneuron activation properties

|                                |         |                                      |                                     |                                     |                |
|--------------------------------|---------|--------------------------------------|-------------------------------------|-------------------------------------|----------------|
|                                | P value | <b>0.99</b>                          | <b>4.8e-8</b>                       | <b>0.009</b>                        | 3.0, 0.05      |
| Maximum Firing Rate (Hz)       | Del     | 36.1±6.4(19.6,49.0) <sup>2,3</sup>   | 45.6±9.4(27.5,83.3) <sup>1</sup>    | 46.6±11.8(30.6,73.5) <sup>1</sup>   | 7.3, 0.007     |
|                                | Imm     | 28.3±6.7(16.9,39.7) <sup>3</sup>     | 37.6±10.6(20.9,60.2) <sup>3</sup>   | 82.4±45.2(25.4,196) <sup>1,2</sup>  | 58.5, >1.0e-15 |
|                                | P value | <b>0.99</b>                          | <b>0.4</b>                          | <b>7.0e-15</b>                      | 37.5, 7.0e-14  |
| SPR FI slope (Hz/pA)           | Del     | 0.084±0.03(0.03,0.15)                | 0.096±0.06(0.01,0.41) <sup>3</sup>  | 0.07±0.05(0.02,0.24) <sup>2</sup>   | 0.3, 0.6       |
|                                | Imm     | 0.062±0.03(0.013,0.12) <sup>3</sup>  | 0.065±0.02(0.03,0.11) <sup>3</sup>  | 0.11±0.08(0.02,0.31) <sup>1,2</sup> | 2.5, 0.08      |
|                                | P value | <b>0.99</b>                          | <b>0.03</b>                         | <b>0.006</b>                        | 12.2, 8.7e-6   |
| <b>Single Spike Properties</b> |         |                                      |                                     |                                     |                |
| Amplitude (mV)                 | Del     | 75.5±4.3(66,84)                      | 73.0±5.3(60,87)                     | 74.8±6.8(61,89)                     | 6.5, 0.01      |
|                                | Imm     | 75.2±5.9(61,87)                      | 76.2±7.8(62,92)                     | 76.7±10.4(68,91)                    | 3.2, 0.04      |
|                                | P value | <b>0.99</b>                          | <b>0.1</b>                          | <b>0.2</b>                          | 2.0, 0.14      |
| Spike rise time (ms)           | Del     | 0.77±0.15(0.40,1.0) <sup>2,3</sup>   | 0.59±0.12(0.31,0.92) <sup>1,3</sup> | 0.47±0.08(0.34,0.65) <sup>1,2</sup> | 39.3, 1.6e-9   |
|                                | Imm     | 0.98±0.28(0.40,1.49) <sup>2,3</sup>  | 0.78±0.22(0.45,1.38) <sup>1,3</sup> | 0.50±0.18(0.28,1.2) <sup>1,2</sup>  | 85.9, >1.0e-15 |
|                                | P value | <b>2.6e-5</b>                        | <b>8.4x10e-8</b>                    | <b>0.8</b>                          | 7.1, 0.001     |
| Spike Half width (ms)          | Del     | 0.99±0.22(0.53,1.39) <sup>2,3</sup>  | 0.66±0.14(0.44,0.99) <sup>1,3</sup> | 0.57±0.11(0.38,0.82) <sup>1,2</sup> | 28.1, 2.5e-7   |
|                                | Imm     | 1.26±0.28(0.73,1.95) <sup>2,3</sup>  | 0.89±0.34(0.48,2.38) <sup>1,2</sup> | 0.51±0.13(0.32,0.81) <sup>1,2</sup> | 128, >1.0e-15  |
|                                | P value | <b>5.8e-6</b>                        | <b>3.2e-7</b>                       | <b>0.2</b>                          | 13.5, 2.7e-6   |
| AHP Amplitude (mV)             | Del     | 6.7±2.2(3.6,12.7)                    | 6.6±2.0(2.9,12.3)                   | 6.3±2.5(1.3,12.5)                   | 0.07, 0.78     |
|                                | Imm     | 4.5. ±1.9(1.1,9.6) <sup>2,3</sup>    | 7.3±2.5(2.5,11.9) <sup>1</sup>      | 7.5±3.6(1.6,14.9) <sup>1</sup>      | 6.4, 0.002     |
|                                | P value | <b>0.008</b>                         | <b>0.6</b>                          | <b>0.3</b>                          | 9.3, 1.3e-4    |
| AHP Half width (ms)            | Del     | 61.1±18.8(31.8,135.1) <sup>2,3</sup> | 43.3±12.7(22.1,80.1) <sup>1</sup>   | 49.9±19.7(14.6,94.9) <sup>1</sup>   | 38.8, 2.0e-9   |
|                                | Imm     | 66.9±20.2(24.7,107.4)                | 75.8±31.3(32.1,152.3)               | 67.7±32.6(24.7,136.2)               | 1.1, 0.3       |
|                                | P value | <b>0.6</b>                           | <b>4.0e-11</b>                      | <b>6.1 e-3</b>                      | 6.7, 0.001     |

## Postnatal development of motoneuron activation properties

**Supplementary Table 2: Active properties of delayed and immediate firing motoneuron subtypes across three postnatal weeks.** Characteristics of the subthreshold membrane potential trajectory during slow depolarizing recruitment current ramps. Presented are the acceleration onset voltage, acceleration amplitude, passive recruitment current estimated based on the initial linear trajectory of the membrane potential, actual measured recruitment current, and an estimate of the underlying persistent inward current (ePIC) that produces the membrane potential acceleration. Delta I reflects the difference in derecruitment and recruitment currents on triangular depolarizing current ramps and provides an additional estimate of PIC. PICs were measured in voltage clamp during weeks 2-3 with the onset voltage, peak voltage, current amplitude, and densities measured. Sag conductance was estimated during weeks 1-3 and underlying h current (I<sub>h</sub>) measured with amplitude and density at -70 mV and -110 mV presented. Time constant (tau) of I<sub>h</sub>. Statistics: Data were analyzed using 2 Factor ANOVA with MN type (Delayed and Immediate) and developmental week (Week 1, 2, 3) as factors. Statistical analyses addressed 3 core questions: 1.) Was there a difference between subtypes? 2.) Did it change during development? 3.) Do the subtypes mature differentially during development? Statistical results listing F and p values from 2 factor ANOVA addressing these questions are listed sequentially: 1: Main effect of subtype; 2: Main effect of development; 3: Subtype x development interaction. All data are presented as mean ± SD (min, max). Number of cells (n) are included in brackets for each group. P values are derived from Holm-Sidak post hoc comparisons within weeks, between MN types. Superscript numbers denote significant differences from Holm-Sidak within MN types, between weeks (1: week 1; 2: week 2; 3: week 3).

| <b>Postnatal Maturation of Active Properties in Fast and Slow Motoneurons</b> |         |                                                |                                                |                                                |                                              |
|-------------------------------------------------------------------------------|---------|------------------------------------------------|------------------------------------------------|------------------------------------------------|----------------------------------------------|
| <b>Parameter</b>                                                              |         | <b>Week 1 (P1-4)<sup>1</sup></b>               | <b>Week 2 (P7-12)<sup>2</sup></b>              | <b>Week 3 (P14-20)<sup>3</sup></b>             | <b>2W ANOVA<br/>F, p</b>                     |
| <b>Subthreshold Membrane Potential Acceleration on Recruitment Ramp</b>       |         |                                                |                                                |                                                |                                              |
| Acceleration onset voltage (mV)                                               | Del     | -49.1±3.8(-53.9, -39.8) <sup>2,3</sup><br>(33) | -51.8±2.5(-57.2, -45.5) <sup>1</sup><br>(82)   | -51.4±4.4(-59.1, -35.9) <sup>1</sup><br>(53)   | 1.9, 0.2<br>24.9, 1.4e-10<br>6.1, 0.003      |
|                                                                               | Imm     | -48.0±4.4(-56.5, -38.2) <sup>2,3</sup><br>(24) | -52.0±3.4(-57.3, -44.2) <sup>1,3</sup><br>(40) | -55.6±3.1(-57.8, -47.0) <sup>1,2</sup><br>(28) |                                              |
|                                                                               | P value | <b>0.7</b>                                     | <b>0.8</b>                                     | <b>0.003</b>                                   |                                              |
| Acceleration Amplitude (dV)<br>Spike TH - Acceleration onset (mV)             | Del     | 11.0±3.7(4.4, 21.3)<br>(33)                    | 12.9±2.3(7.0, 18.5)<br>(82)                    | 12.1±3.4(6.1, 24.9)<br>(53)                    | 4.1, 0.04<br>0.9, 0.4<br>2.2, 0.1            |
|                                                                               | Imm     | 11.6±4.2(3.8, 20.6)<br>(24)                    | 11.0±4.1(3.8, 22.2)<br>(40)                    | 10.5±3.4(3.4, 17.6)<br>(28)                    |                                              |
|                                                                               | P value | <b>0.98</b>                                    | <b>0.1</b>                                     | <b>0.5</b>                                     |                                              |
| Passive Rheobase (pA)                                                         | Del     | 497±280(168, 1267) <sup>2,3</sup><br>(33)      | 1017±492(268, 2560) <sup>1,3</sup><br>(82)     | 1498±1100(272, 4154) <sup>1,2</sup><br>(53)    | 66.7, 1.7e-13<br>7.1, 0.001<br>15.8, 3.4e-7  |
|                                                                               | Imm     | 433±218(115, 985)<br>(24)                      | 411±392(57, 1518)<br>(40)                      | 250±164(60, 672)<br>(40)                       |                                              |
|                                                                               | P value | <b>0.9</b>                                     | <b>6.8e-7</b>                                  | <b>1.0e-15</b>                                 |                                              |
| Actual Rheobase (pA)                                                          | Del     | 349±214(118, 1010) <sup>2,3</sup><br>(33)      | 550±254(149, 1619) <sup>1,3</sup><br>(82)      | 816±631(127, 2929) <sup>1,2</sup><br>(53)      | 45.4, 1.1e-10<br>3.4, 0.04<br>12.1, 9.6e-6   |
|                                                                               | Imm     | 327±178(101, 757)<br>(24)                      | 235±225(23, 891)<br>(40)                       | 173±176(23, 797)<br>(28)                       |                                              |
|                                                                               | P value | <b>0.8</b>                                     | <b>1.0e-4</b>                                  | <b>2.3e-12</b>                                 |                                              |
| ePIC Passive-Actual Rheobase (pA)                                             | Del     | 150±107(-18, 439) <sup>2,3</sup><br>(33)       | 500±348(101, 1855) <sup>1,3</sup><br>(82)      | 727±579(137, 3072) <sup>1,2</sup><br>(53)      | 44.4, 1.8e-9<br>10.9, 3.0e-5<br>10.2, 5.6e-5 |
|                                                                               | Imm     | 116±105(-32, 389)<br>(24)                      | 174±216(5.0, 1110)<br>(40)                     | 112±110(23, 519)<br>(28)                       |                                              |
|                                                                               | P value | <b>0.99</b>                                    | <b>4.9e-5</b>                                  | <b>6.4e-14</b>                                 |                                              |
| <b>Recruitment-derecruitment Hysteresis and Persistent Inward Current</b>     |         |                                                |                                                |                                                |                                              |
| Delta I Hysteresis (pA)                                                       | Del     | -112±165(-510, 123) <sup>2,3</sup><br>(16)     | -280±129(-601, -10) <sup>1,3</sup><br>(56)     | -339±181(-976, -71)<br>(53)                    | 85.9, <1.0e-15<br>5.8, 0.004<br>6.1, 0.003   |
|                                                                               | Imm     | 7.7±110(-178, 184)<br>(9)                      | -20±51(-147, 37)<br>(21)                       | 9.2±99.3(309, -224)<br>(28)                    |                                              |
|                                                                               | P value | <b>0.2</b>                                     | <b>7.1e-10</b>                                 | <b>1.0e-16</b>                                 |                                              |
| PIC onset (mV)                                                                | Del     |                                                | -50.2±4.1(-59.7, -39.9)<br>(25)                | -49.0±4.6(-59.0, -42.5)<br>(14)                | 57.6, 2.2e-10<br>0.3, 0.6<br>0.2, 0.7        |
|                                                                               | Imm     |                                                | -58.3±4.4(-67.0, -51.5)<br>(14)                | -58.2±4.9(-64.1, -49.1)<br>(13)                |                                              |
|                                                                               | P value |                                                | <b>5.0e-6</b>                                  | <b>6.0e-6</b>                                  |                                              |
| PIC peak (mV)                                                                 | Del     |                                                | -32.8±5.0 (-45.7, -22.7)<br>(25)               | -30.2±6.3(-37.6, -19.4)<br>(14)                | 38.6, 5.1e-8<br>0.85, 0.4<br>1.3, 0.3        |
|                                                                               | Imm     |                                                | -39.6±5.4(-53.3, -32.0)<br>(14)                | -39.9±4.7(-53.1, -34.3)<br>(13)                |                                              |
|                                                                               | P value |                                                | <b>0.0032</b>                                  | <b>0.0005</b>                                  |                                              |
| PIC amplitude (pA)                                                            | Del     |                                                | 386±236(60, 1055)<br>(24)                      | 502±205(175, 950)<br>(14)                      | 17.9, 7.8e-5<br>5.8, 0.02<br>0.02, 0.9       |
|                                                                               | Imm     |                                                | 164±121(52, 366)                               | 271±80(49, 680)                                |                                              |

Postnatal development of motoneuron activation properties

|                              |         |                                         |                                            |                                               |                                             |
|------------------------------|---------|-----------------------------------------|--------------------------------------------|-----------------------------------------------|---------------------------------------------|
|                              |         |                                         | (14)                                       | (13)                                          |                                             |
|                              | P value |                                         | <b>0.007</b>                               | <b>0.03</b>                                   |                                             |
| PIC density (pA/pF)          | Del     |                                         | 0.87±0.45(0.17,1.95) <sup>3</sup><br>(25)  | 1.45±0.98(0.39,3.8) <sup>2</sup><br>(14)      | 5.3, 0.02<br>13.8, 4.4e-4<br>0.3, 0.6       |
|                              | Imm     |                                         | 0.60±0.35(0.1, 1.3) <sup>3</sup><br>(14)   | 1.08±0.47(0.23,1.9) <sup>2</sup><br>(13)      |                                             |
|                              | P value |                                         | <b>0.3</b>                                 | <b>0.2</b>                                    |                                             |
| <b>Sag and Ih</b>            |         |                                         |                                            |                                               |                                             |
| eSag Conductance (nS)        | Del     | 3.6±3.5(-5.5,12.9) <sup>3</sup><br>(33) | 6.5±13.1(-41.6,43.2) <sup>3</sup><br>(82)  | 31.9±35.9(-25.2,129.1) <sup>1,2</sup><br>(53) | 7.5, 0.007<br>7.3, 8.3e-4<br>5.2, 0.006     |
|                              | Imm     | 4.3±5.3(-2.2,25.2)<br>(24)              | 6.0±15.8(-28.7,49.0)<br>(40)               | 7.2±6.7(-2.6,28.7)<br>(28)                    |                                             |
|                              | P value | <b>0.99</b>                             | <b>0.99</b>                                | <b>8.9e-7</b>                                 |                                             |
| Ih amplitude (-70 mV) (pA)   | Del     |                                         | -25±42(4.2, -113) <sup>3</sup><br>(15)     | -119±103(-7.3, -275) <sup>2</sup><br>(19)     | 14.4, 3.0e-4<br>5.3, 0.02<br>13.4, 5.3e-4   |
|                              | Imm     |                                         | -23±93(50.6, -116)<br>(12)                 | -1.9±14.4(23.1, -26.2)<br>(19)                |                                             |
|                              | P value |                                         | <b>0.98</b>                                | <b>2.0e-5</b>                                 |                                             |
| Ih Density (-70 mV) (pA/pF)  | Del     |                                         | -0.05±0.1(0.2, -0.2) <sup>3</sup><br>(15)  | -0.53±0.85(-0.01, -3.0) <sup>2</sup><br>(19)  | 3.6, 0.06<br>2.5, 0.1<br>6.0, 0.02          |
|                              | Imm     |                                         | -0.12±0.1(0.15, -0.4)<br>(12)              | -0.015±0.07(0.1, -0.1)<br>(19)                |                                             |
|                              | P value |                                         | <b>0.99</b>                                | <b>0.01</b>                                   |                                             |
| Ih amplitude (-110 mV) (pA)  | Del     |                                         | -776±535(-67, -1472) <sup>3</sup><br>(15)  | -1176±557(-131, -2749) <sup>2</sup><br>(18)   | 29.5, 1.1e-6<br>1.3, 0.3<br>6.1, 0.02       |
|                              | Imm     |                                         | -449±330(-51, -902)<br>(12)                | -302±196(-94, -640)<br>(19)                   |                                             |
|                              | P value |                                         | <b>0.1</b>                                 | <b>3.0e-7</b>                                 |                                             |
| Ih Density (-110 mV) (pA/pF) | Del     |                                         | -1.8±1.4(-0.25, -5.5) <sup>3</sup><br>(15) | -4.6±5.8(-0.5, -21.4) <sup>2</sup><br>(18)    | 4.9, 0.03<br>2.0, 0.2<br>4.0, 0.05          |
|                              | Imm     |                                         | -1.6±1.0(-0.4, -3.4)<br>(12)               | -1.2±0.76(-0.17, -2.6)<br>(19)                |                                             |
|                              | P value |                                         | <b>0.99</b>                                | <b>0.015</b>                                  |                                             |
| Ih tau (-110 mV) (s)         | Del     |                                         | 0.37±0.11(0.3,0.7) <sup>3</sup><br>(15)    | 0.22±0.07(0.1,0.3) <sup>2</sup><br>(19)       | 50.1, 4.1e9<br>31.2, 1.0e-6<br>50.1, 4.1e-9 |
|                              | Imm     |                                         | 0.51±0.09(0.4,0.7) <sup>3</sup><br>(12)    | 0.41±0.05(0.3,0.5) <sup>2</sup><br>(19)       |                                             |
|                              | P value |                                         | <b>0.005</b>                               | <b>1.5e-9</b>                                 |                                             |

**Supplementary Table 3:** A comparison of studies on lumbar motoneuron intrinsic properties recorded with whole-cell patch clamp electrophysiology across the first three weeks of postnatal development in mice. Comparison of intrinsic properties measured in studies on motoneuron subtypes (Sharples Miles, 2021; Leroy et al. 2014) and those that pooled all lumbar motoneurons studied (Quinlan et al., 2014; Nakanishi and Whelan, 2010; Smith and Brownstone, 2020). Data are presented as mean  $\pm$  SD; Nakanishi and Whelan (2010) are presented as mean  $\pm$  SEM.

| Property                 | MN Type | Week 1                   |                           |                      |                            | Week 2                   |                           |                    |                      | Week 3                     |                          |                           |
|--------------------------|---------|--------------------------|---------------------------|----------------------|----------------------------|--------------------------|---------------------------|--------------------|----------------------|----------------------------|--------------------------|---------------------------|
|                          |         | Sharples and Miles, 2021 | Smith and Brownstone 2020 | Quinlan et al., 2011 | Nakanishi and Whelan, 2010 | Sharples and Miles, 2021 | Smith and Brownstone 2020 | Leroy et al., 2014 | Quinlan et al., 2011 | Nakanishi and Whelan, 2010 | Sharples and Miles, 2021 | Smith and Brownstone 2020 |
| Age range (P)            |         | 1-4                      | 2-3                       | 0-5                  | 0-3                        | 7-14                     | 6-7                       | 6-10               | 6-12                 | 8-11                       | 14-20                    | 14-21                     |
| N's                      | Del     | 31                       | 17                        | 16                   | 72                         | 82                       | 30                        | 63                 | 20                   | 36                         | 53                       | 18                        |
|                          | Imm     | 23                       |                           |                      |                            | 40                       |                           | 31                 |                      |                            | 28                       |                           |
| Capacitance (pF)         | Del     | 285 $\pm$ 94             | 223 $\pm$ 71              | 273 $\pm$ 81         | 88 $\pm$ 5.3               | 494 $\pm$ 211            | 310 $\pm$ 140             |                    | 321 $\pm$ 83         | 99 $\pm$ 8.3               | 467 $\pm$ 271            | 405 $\pm$ 217             |
|                          | Imm     | 243 $\pm$ 73             |                           |                      |                            | 312 $\pm$ 191            |                           |                    |                      |                            | 258 $\pm$ 99             |                           |
| Input Res. (M $\Omega$ ) | Del     | 65.1 $\pm$ 33            | 79 $\pm$ 47               | 62 $\pm$ 17          | 100 $\pm$ 6                | 30.8 $\pm$ 15.9          | 52 $\pm$ 32               |                    |                      | 87 $\pm$ 10                | 27.2 $\pm$ 18.6          | 31 $\pm$ 32               |
|                          | Imm     | 76.6 $\pm$ 35            |                           |                      |                            | 94.4 $\pm$ 62.5          |                           |                    |                      |                            | 106.0 $\pm$ 88.2         |                           |
| RMP (mV)                 | Del     | -62.6 $\pm$ 4.0          | -65 $\pm$ 4.4             | -57 $\pm$ 4          |                            | -63.9 $\pm$ 4.2          | -65 $\pm$ 3.2             | -64 $\pm$ 3        | -60 $\pm$ 6          |                            | -66.8 $\pm$ 3.6          | -67 $\pm$ 2.7             |
|                          | Imm     | -61.7 $\pm$ 4.4          |                           |                      |                            | -58.3 $\pm$ 5.4          |                           | -65 $\pm$ 3        |                      |                            | -61.5 $\pm$ 6.9          |                           |
| Rheobase (pA)            | Del     | 349 $\pm$ 214            | 450 $\pm$ 380             | 368 $\pm$ 175        | 157 $\pm$ 8.4              | 550 $\pm$ 254            | 520 $\pm$ 270             | 1100 $\pm$ 600     | 374 $\pm$ 18         | 288 $\pm$ 40               | 816 $\pm$ 631            | 1500 $\pm$ 1100           |
|                          | Imm     | 327 $\pm$ 178            |                           |                      |                            | 235 $\pm$ 225            |                           | 600 $\pm$ 500      |                      |                            | 173 $\pm$ 176            |                           |
| Spike TH (mV)            | Del     | -37.9 $\pm$ 3.7          | -36 $\pm$ 9.5             | -29 $\pm$ 5          | -52 $\pm$ 8.4              | -38.8 $\pm$ 3.3          | -37 $\pm$ 7.2             | -33 $\pm$ 7        | -30 $\pm$ 7          | -56 $\pm$ 2.1              | -43.7 $\pm$ 3.8          | -35 $\pm$ 8.2             |
|                          | Imm     | -36.6 $\pm$ 3.1          |                           |                      |                            | -41.3 $\pm$ 4.6          |                           | -44 $\pm$ 7        |                      |                            | -47.2 $\pm$ 4.5          |                           |
| Spike Amplitude (mV)     | Del     | 75.5 $\pm$ 4.3           | 69 $\pm$ 7.8              |                      | 74 $\pm$ 1.2               | 73.0 $\pm$ 5.3           | 68 $\pm$ 38               | 89 $\pm$ 13        |                      | 75 $\pm$ 2.5               | 74.8 $\pm$ 6.8           | 70 $\pm$ 8.5              |
|                          | Imm     | 75.2 $\pm$ 5.9           |                           |                      |                            | 76.2 $\pm$ 7.8           |                           | 84 $\pm$ 11        |                      |                            | 76.7 $\pm$ 10.4          |                           |
| Spike HW/*dur. (ms)      | Del     | 0.99 $\pm$ 0.22          | 1.2 $\pm$ 0.2             | 1.5 $\pm$ 0.6*       | 1.33 $\pm$ 0.05            | 0.66 $\pm$ 0.14          | 1.0 $\pm$ 0.2             | 1.4 $\pm$ 0.5*     | 1.1 $\pm$ 0.3*       | 0.97 $\pm$ 0.07            | 0.57 $\pm$ 0.11          | 0.8 $\pm$ 0.2             |
|                          | Imm     | 1.26 $\pm$ 0.28          |                           |                      |                            | 0.89 $\pm$ 0.34          |                           | 1.7 $\pm$ 0.4*     |                      |                            | 0.51 $\pm$ 0.13          |                           |
| Spike Rise Time (ms)     | Del     | 0.77 $\pm$ 0.15          |                           |                      | 0.98 $\pm$ 0.04            | 0.59 $\pm$ 0.12          |                           |                    |                      | 0.81 $\pm$ 0.06            | 0.47 $\pm$ 0.08          |                           |
|                          | Imm     | 0.98 $\pm$ 0.28          |                           |                      |                            | 0.78 $\pm$ 0.22          |                           |                    |                      |                            | 0.50 $\pm$ 0.18          |                           |
| mAHP Amplitude (mV)      | Del     | 6.7 $\pm$ 2.2            | 5.3 $\pm$ 2.4             | 9.4 $\pm$ 2.3        |                            | 6.6 $\pm$ 2.0            | 4.1 $\pm$ 1.9             |                    | 9.1 $\pm$ 3          |                            | 6.3 $\pm$ 2.5            | 3.0 $\pm$ 1.6             |
|                          | Imm     | 4.5. $\pm$ 1.9           |                           |                      |                            | 7.3 $\pm$ 2.5            |                           |                    |                      |                            | 7.5 $\pm$ 3.6            |                           |
| mAHP Half width (ms)     | Del     | 61.1 $\pm$ 18.8          | 67 $\pm$ 22               |                      | 45 $\pm$ 11                | 43.3 $\pm$ 12.7          | 74 $\pm$ 39               | 27 $\pm$ 9         |                      | 49 $\pm$ 20                | 49.9 $\pm$ 19.7          | 74 $\pm$ 31               |
|                          | Imm     | 66.9 $\pm$ 20.2          |                           |                      |                            | 75.8 $\pm$ 31.3          |                           | 42 $\pm$ 9         |                      |                            | 67.7 $\pm$ 32.6          |                           |
| Min. FR (Hz)             | Del     | 10.9 $\pm$ 3.7           |                           |                      |                            | 10.5 $\pm$ 5.2           |                           |                    |                      |                            | 6.9 $\pm$ 2.2            |                           |
|                          | Imm     | 11.3 $\pm$ 4.8           |                           |                      |                            | 7.1 $\pm$ 2.4            |                           |                    |                      |                            | 7.4 $\pm$ 2.5            |                           |
| Max FR (Hz)              | Del     | 36.1 $\pm$ 6.4           | 44 $\pm$ 8                |                      |                            | 45.6 $\pm$ 9.4           | 46 $\pm$ 19               |                    |                      |                            | 46.6 $\pm$ 11.8          | 56 $\pm$ 17               |
|                          | Imm     | 28.3 $\pm$ 6.7           |                           |                      |                            | 37.6 $\pm$ 10.6          |                           |                    |                      |                            | 82.4 $\pm$ 45.2          |                           |
| ePIC ramp Delta I (pA)   | Del     | -112 $\pm$ 165           |                           | -52 $\pm$ 134        |                            | -280 $\pm$ 129           |                           |                    | -117 $\pm$ 195       |                            | -339 $\pm$ 181           |                           |
|                          | Imm     | 7.7 $\pm$ 110            |                           |                      |                            | -20 $\pm$ 51             |                           |                    |                      |                            | 9.2 $\pm$ 99.3           |                           |
| PIC Onset Voltage (mV)   | Del     |                          |                           | -46 $\pm$ 5          |                            | -50.2 $\pm$ 4.1          |                           |                    | -42 $\pm$ 10         |                            | -49.0 $\pm$ 4.6          |                           |
|                          | Imm     |                          |                           |                      |                            | -58.3 $\pm$ 4.4          |                           |                    |                      |                            | -58.2 $\pm$ 4.9          |                           |
| PIC Amplitude (pA)       | Del     |                          |                           | 149 $\pm$ 96         |                            | 386 $\pm$ 236            |                           |                    | 214 $\pm$ 127        |                            | 502 $\pm$ 205            |                           |
|                          | Imm     |                          |                           |                      |                            | 164 $\pm$ 121            |                           |                    |                      |                            | 271 $\pm$ 80             |                           |
| PIC Density (pA/pF)      | Del     |                          |                           | 0.52 $\pm$ 0.27      |                            | 0.87 $\pm$ 0.45          |                           |                    | 0.7 $\pm$ 0.4        |                            | 1.45 $\pm$ 0.98          |                           |
|                          | Imm     |                          |                           |                      |                            | 0.60 $\pm$ 0.35          |                           |                    |                      |                            | 1.08 $\pm$ 0.47          |                           |
